# Supplementary material for: Design and Synthesis of Pyrrolidinyl Ferrocene-Containing Ligands and Their Application in Highly Enantioselective Rhodium-Catalyzed Olefin Hydrogenation
Source: MDPI journal article supplement (doi:10.3390/molecules27186078), 2022-09-17
Supplement: s1 [file s1]

# Design and Synthesis of Pyrrolidinyl Ferrocene-containing Ligands and Their Application in Highly Enantioselective Rhodium-catalyzed Olefin Hydrogenation

Xin Li, Cian Kingston, Yannick Ortin and Patrick J. Guiry\*

## Supplementary Information

### Table of Contents

|                                                                                               |    |
|-----------------------------------------------------------------------------------------------|----|
| Methods for the Determination of Enantiomeric Excess (Table S1) .....                         | 2  |
| SFC Chromatograms of Racemic and Enantioenriched Compounds.....                               | 4  |
| <sup>1</sup> H NMR, <sup>13</sup> C NMR and <sup>31</sup> P NMR Spectra of New Compounds..... | 21 |
| X-Ray Crystallographic Structure for <b>L5</b> .....                                          | 49 |

**Methods for the Determination of Enantiomeric Excess (Table S1)**

| Entry | Product                                                                                           | Assay Conditions                                                                                | Retention time (min) of major enantiomer | Retention time (min) of minor enantiomer |
|-------|---------------------------------------------------------------------------------------------------|-------------------------------------------------------------------------------------------------|------------------------------------------|------------------------------------------|
| 1     | 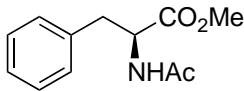<br><b>17a</b>   | HPLC, Chiralcel AD column, Isocratic 90/10 IPA/ <i>n</i> -hex, 25 °C oven, 1 mL/min flow, 220nm | 11.59                                    | 9.07                                     |
| 2     | <br><b>17b</b>   | HPLC, Chiralcel AD column, Isocratic 85/15 IPA/ <i>n</i> -hex, 25 °C oven, 1 mL/min flow, 220nm | 10.47                                    | 8.14                                     |
| 3     | <br><b>17c</b>   | HPLC, Chiralcel AD column, Isocratic 90/10 IPA/ <i>n</i> -hex, 25 °C oven, 1 mL/min flow, 220nm | 11.68                                    | 9.07                                     |
| 4     | <br><b>17d</b>   | HPLC, Chiralcel AD column, Isocratic 90/10 IPA/ <i>n</i> -hex, 25 °C oven, 1 mL/min flow, 220nm | 12.44                                    | 10.47                                    |
| 5     | <br><b>17e</b> | HPLC, Chiralcel AD column, Isocratic 90/10 IPA/ <i>n</i> -hex, 25 °C oven, 1 mL/min flow, 220nm | 12.58                                    | 10.88                                    |
| 6     | <br><b>17f</b> | HPLC, Chiralcel AD column, Isocratic 90/10 IPA/ <i>n</i> -hex, 25 °C oven, 1 mL/min flow, 254nm | 29.97                                    | 27.33                                    |
| 7     | <br><b>17g</b> | HPLC, Chiralcel AD column, Isocratic 90/10 IPA/ <i>n</i> -hex, 25 °C oven, 1 mL/min flow, 220nm | 10.42                                    | 8.89                                     |
| 8     | <br><b>17h</b> | HPLC, Chiralcel OD column, Isocratic 95/5 IPA/ <i>n</i> -hex, 25 °C oven, 1 mL/min flow, 220nm  | 24.03                                    | 21.02                                    |
| 9     | <br><b>17i</b> | HPLC, Chiralcel AD column, Isocratic 90/10 IPA/ <i>n</i> -hex, 25 °C oven, 1 mL/min flow, 220nm | 12.58                                    | 9.41                                     |

|    |                                                                                                       |                                                                                                 |       |       |
|----|-------------------------------------------------------------------------------------------------------|-------------------------------------------------------------------------------------------------|-------|-------|
| 10 | 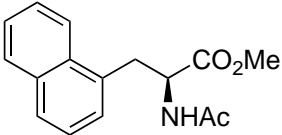 <p><b>17j</b></p>   | HPLC, Chiralcel OD column, Isocratic 90/10 IPA/ <i>n</i> -hex, 25 °C oven, 1 mL/min flow, 220nm | 13.25 | 10.53 |
| 11 |  <p><b>17k</b></p>   | HPLC, Chiralcel AD column, Isocratic 93/7 IPA/ <i>n</i> -hex, 25 °C oven, 1 mL/min flow, 210nm  | 10.83 | 9.45  |
| 12 |  <p><b>19a</b></p>   | HPLC, Chiralcel AD column, Isocratic 94/6 IPA/ <i>n</i> -hex, 25 °C oven, 1 mL/min flow, 220nm  | 11.63 | 9.72  |
| 13 |  <p><b>19b</b></p>   | HPLC, Chiralcel AD column, Isocratic 90/10 IPA/ <i>n</i> -hex, 25 °C oven, 1 mL/min flow, 254nm | 9.95  | 7.63  |
| 14 |  <p><b>19c</b></p>  | HPLC, Chiralcel AD column, Isocratic 90/10 IPA/ <i>n</i> -hex, 25 °C oven, 1 mL/min flow, 254nm | 11.13 | 9.28  |
| 15 |  <p><b>19d</b></p> | HPLC, Chiralcel AD column, Isocratic 93/7 IPA/ <i>n</i> -hex, 25 °C oven, 1 mL/min flow, 220nm  | 15.18 | 12.57 |
| 16 |  <p><b>19e</b></p> | HPLC, Chiralcel OD column, Isocratic 90/10 IPA/ <i>n</i> -hex, 25 °C oven, 1 mL/min flow, 210nm | 9.50  | 12.83 |
| 17 |  <p><b>19f</b></p> | HPLC, Chiralcel OD column, Isocratic 95/5 IPA/ <i>n</i> -hex, 25 °C oven, 1 mL/min flow, 220nm  | 30.91 | 25.78 |

## SFC Chromatograms of Racemic and Enantioenriched Compounds

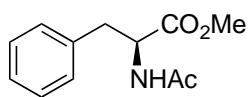

**17a**

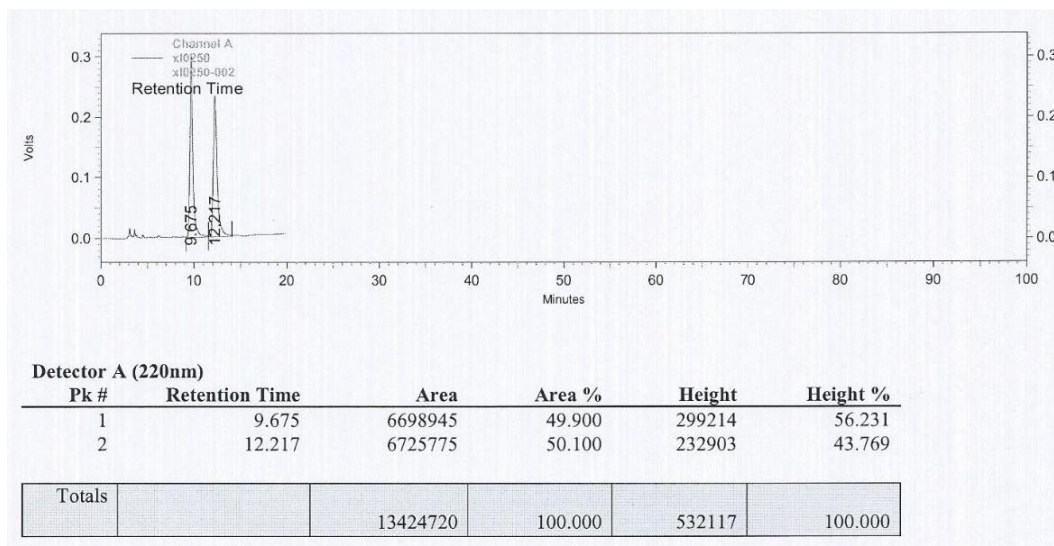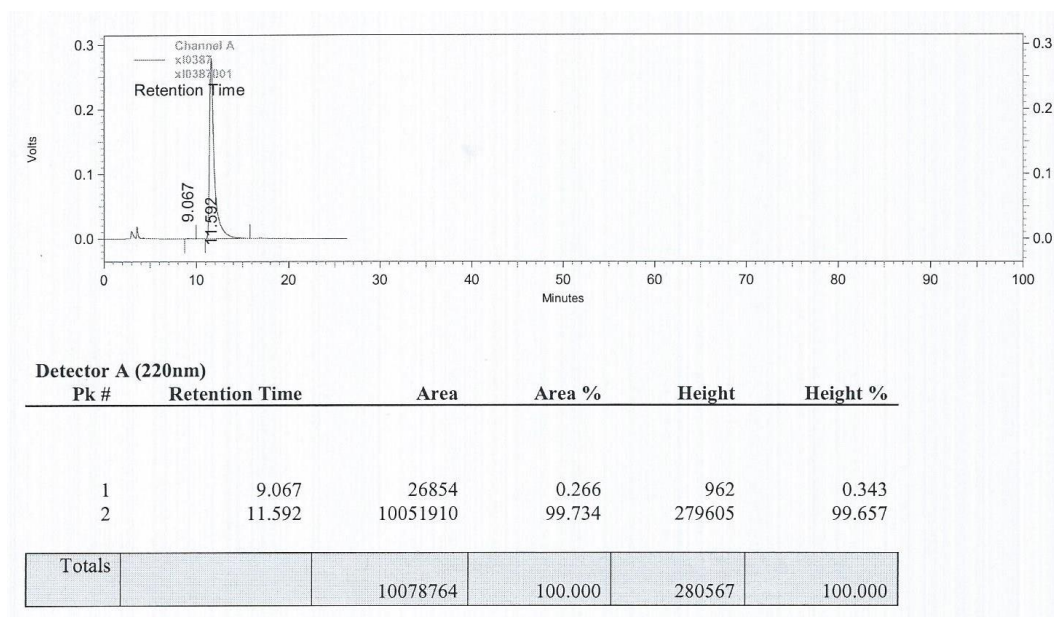

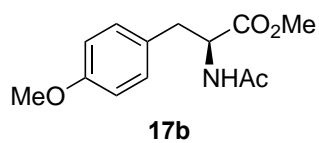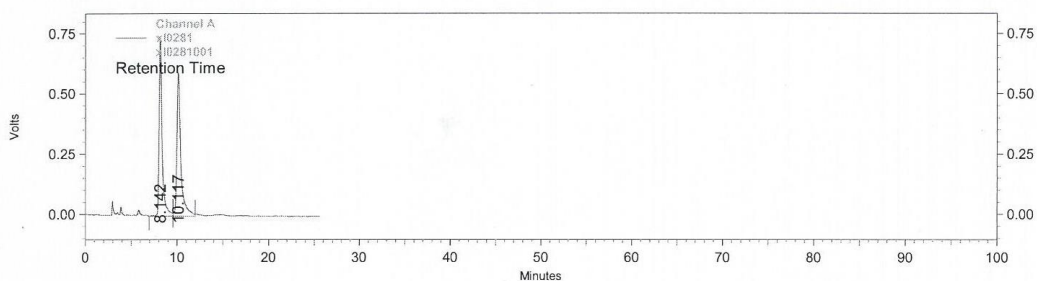

Detector A (220nm)

| Pk #   | Retention Time | Area     | Area %  | Height  | Height % |
|--------|----------------|----------|---------|---------|----------|
| 1      | 8.142          | 16695674 | 48.577  | 747180  | 55.722   |
| 2      | 10.117         | 17673937 | 51.423  | 593719  | 44.278   |
| Totals |                | 34369611 | 100.000 | 1340899 | 100.000  |

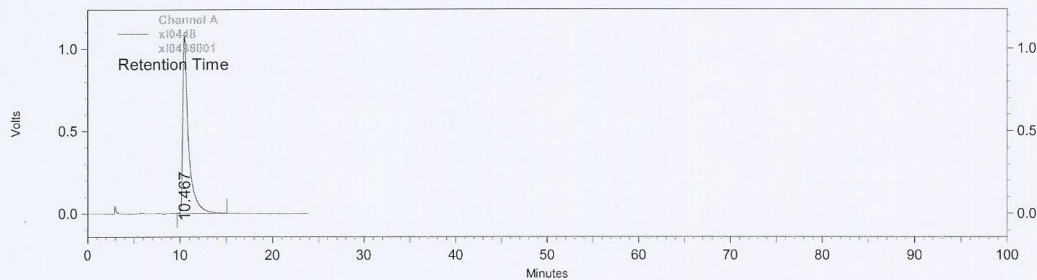

Detector A (220nm)

| Pk #   | Retention Time | Area     | Area %  | Height  | Height % |
|--------|----------------|----------|---------|---------|----------|
| 1      | 10.467         | 46948277 | 100.000 | 1099114 | 100.000  |
| Totals |                | 46948277 | 100.000 | 1099114 | 100.000  |

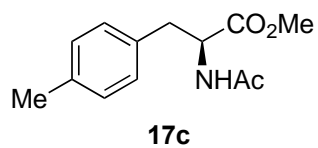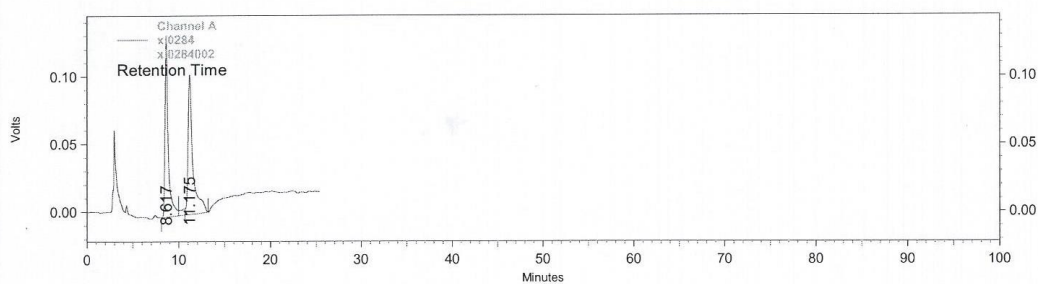

Detector A (220nm)

| Pk # | Retention Time | Area    | Area % | Height | Height % |
|------|----------------|---------|--------|--------|----------|
| 1    | 8.617          | 3224503 | 46.140 | 132105 | 56.177   |
| 2    | 11.175         | 3764000 | 53.860 | 103054 | 43.823   |

|        |  |         |         |        |         |
|--------|--|---------|---------|--------|---------|
| Totals |  | 6988503 | 100.000 | 235159 | 100.000 |
|--------|--|---------|---------|--------|---------|

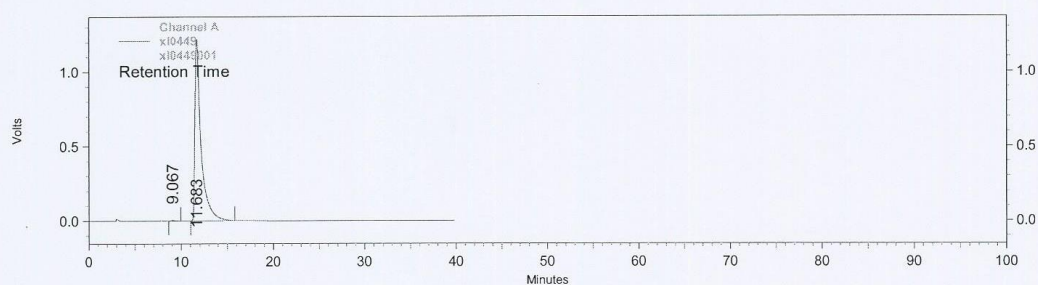

Detector A (220nm)

| Pk # | Retention Time | Area     | Area % | Height  | Height % |
|------|----------------|----------|--------|---------|----------|
| 1    | 9.067          | 168652   | 0.299  | 5646    | 0.461    |
| 2    | 11.683         | 56254004 | 99.701 | 1218756 | 99.539   |

|        |  |          |         |         |         |
|--------|--|----------|---------|---------|---------|
| Totals |  | 56422656 | 100.000 | 1224402 | 100.000 |
|--------|--|----------|---------|---------|---------|

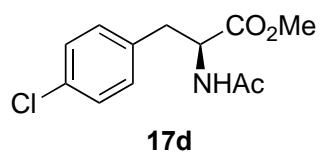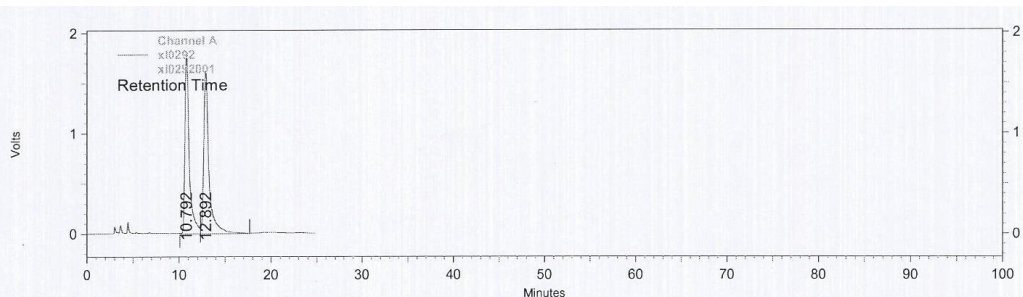

Detector A (220nm)

| Pk # | Retention Time | Area     | Area % | Height  | Height % |
|------|----------------|----------|--------|---------|----------|
| 1    | 10.792         | 59289906 | 47.913 | 1798402 | 52.546   |
| 2    | 12.892         | 64456210 | 52.087 | 1624154 | 47.454   |

|        |  |           |         |         |         |
|--------|--|-----------|---------|---------|---------|
| Totals |  | 123746116 | 100.000 | 3422556 | 100.000 |
|--------|--|-----------|---------|---------|---------|

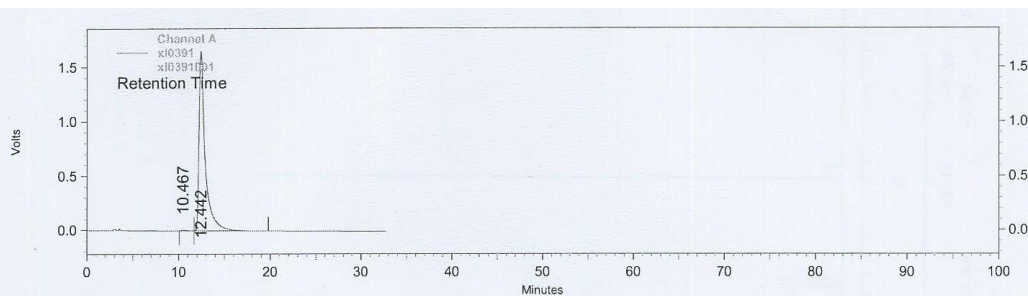

Detector A (220nm)

| Pk # | Retention Time | Area     | Area % | Height  | Height % |
|------|----------------|----------|--------|---------|----------|
| 1    | 10.467         | 221577   | 0.285  | 6516    | 0.392    |
| 2    | 12.442         | 77600571 | 99.715 | 1655071 | 99.608   |

|        |  |          |         |         |         |
|--------|--|----------|---------|---------|---------|
| Totals |  | 77822148 | 100.000 | 1661587 | 100.000 |
|--------|--|----------|---------|---------|---------|



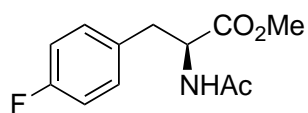

**17e**

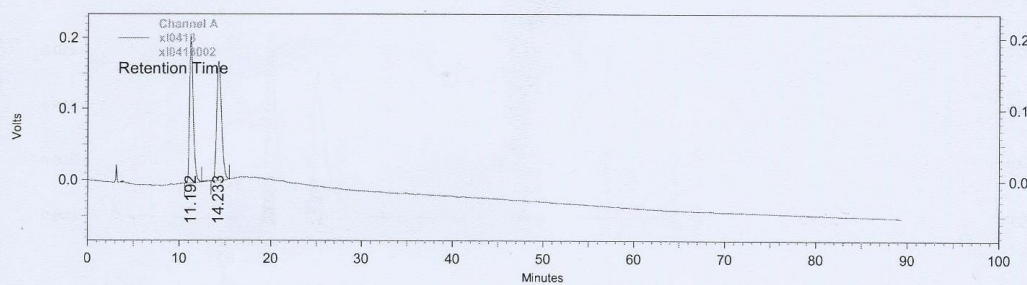

**Detector A (220nm)**

| Pk #   | Retention Time | Area     | Area %  | Height | Height % |
|--------|----------------|----------|---------|--------|----------|
| 1      | 11.192         | 5755130  | 48.120  | 206315 | 55.196   |
| 2      | 14.233         | 6204842  | 51.880  | 167472 | 44.804   |
| Totals |                | 11959972 | 100.000 | 373787 | 100.000  |

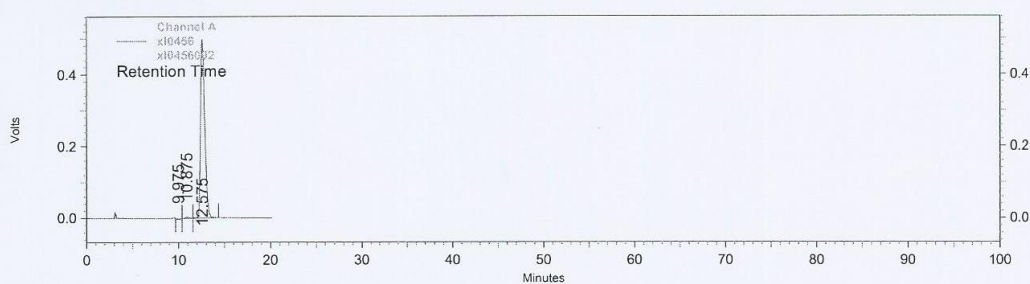

**Detector A (220nm)**

| Pk #   | Retention Time | Area     | Area %   | Height | Height % |
|--------|----------------|----------|----------|--------|----------|
| 1      | 9.975          | 63140    | 0.395    | 2903   | 0.576    |
| 2      | 10.875         | 122709   | 0.768 ✓  | 3681   | 0.730    |
| 3      | 12.575         | 15797125 | 98.837 ✓ | 497357 | 98.693   |
| Totals |                | 15982974 | 100.000  | 503941 | 100.000  |



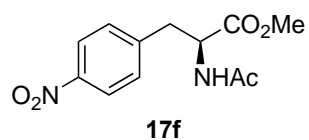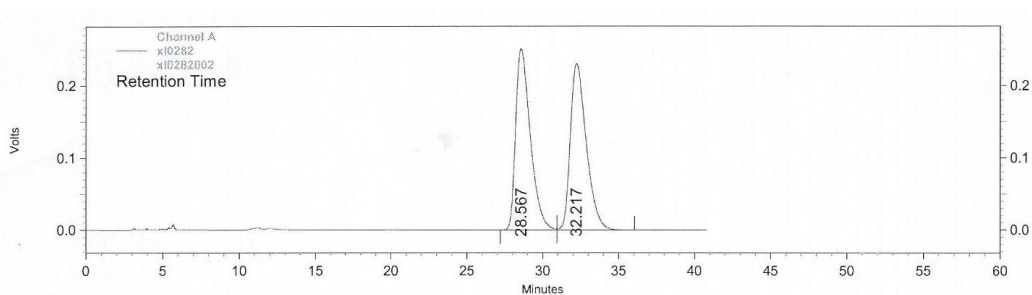

Detector A (254nm)

| Pk #   | Retention Time | Area     | Area %  | Height | Height % |
|--------|----------------|----------|---------|--------|----------|
| 1      | 28.567         | 16899144 | 49.918  | 251033 | 52.164   |
| 2      | 32.217         | 16954378 | 50.082  | 230205 | 47.836   |
| Totals |                | 33853522 | 100.000 | 481238 | 100.000  |

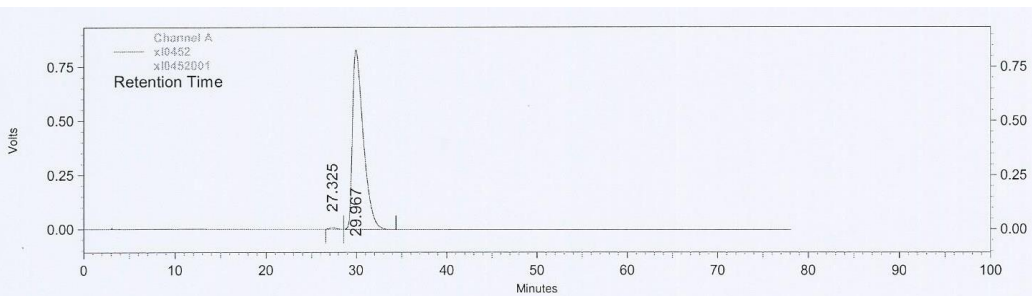

Detector A (254nm)

| Pk #   | Retention Time | Area     | Area %  | Height | Height % |
|--------|----------------|----------|---------|--------|----------|
| 1      | 27.325         | 499490   | 0.716   | 7756   | 0.925    |
| 2      | 29.967         | 69265058 | 99.284  | 830569 | 99.075   |
| Totals |                | 69764548 | 100.000 | 838325 | 100.000  |

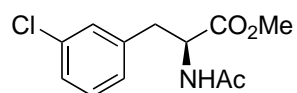

**17g**

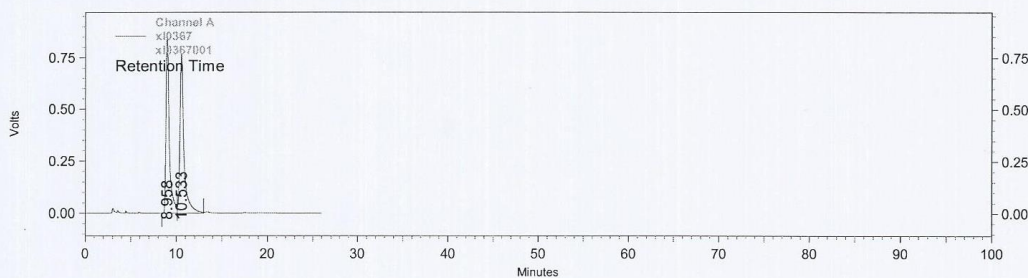

| Detector A (220nm) |                |          |         |         |          |
|--------------------|----------------|----------|---------|---------|----------|
| Pk #               | Retention Time | Area     | Area %  | Height  | Height % |
| 1                  | 8.958          | 21923789 | 48.043  | 861946  | 52.980   |
| 2                  | 10.533         | 23710224 | 51.957  | 764995  | 47.020   |
| Totals             |                | 45634013 | 100.000 | 1626941 | 100.000  |

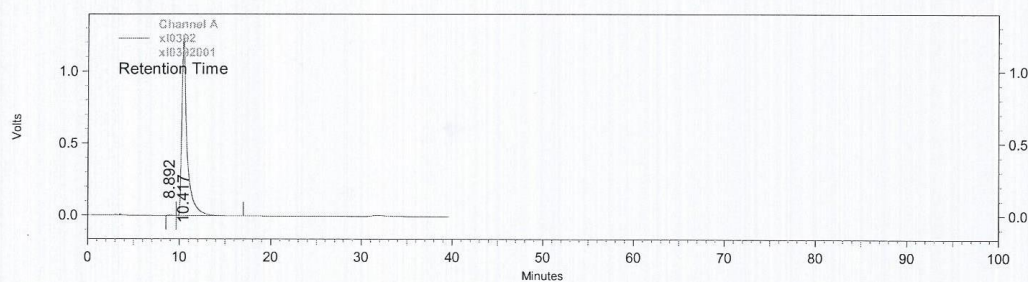

| Detector A (220nm) |                |          |         |         |          |
|--------------------|----------------|----------|---------|---------|----------|
| Pk #               | Retention Time | Area     | Area %  | Height  | Height % |
| 1                  | 8.892          | 138584   | 0.276   | 4925    | 0.395    |
| 2                  | 10.417         | 49997588 | 99.724  | 1242624 | 99.605   |
| Totals             |                | 50136172 | 100.000 | 1247549 | 100.000  |

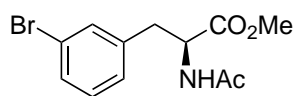

**17h**

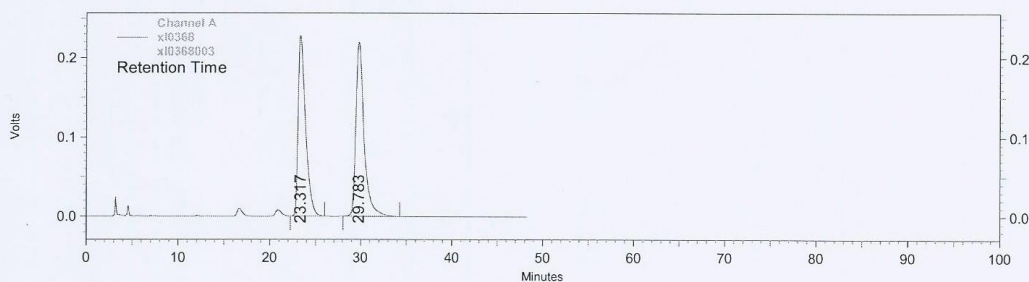

| Detector A (220nm) |                |          |         |        |          |
|--------------------|----------------|----------|---------|--------|----------|
| Pk #               | Retention Time | Area     | Area %  | Height | Height % |
| 1                  | 23.317         | 12842045 | 48.218  | 227695 | 50.932   |
| 2                  | 29.783         | 13791122 | 51.782  | 219366 | 49.068   |
| Totals             |                | 26633167 | 100.000 | 447061 | 100.000  |

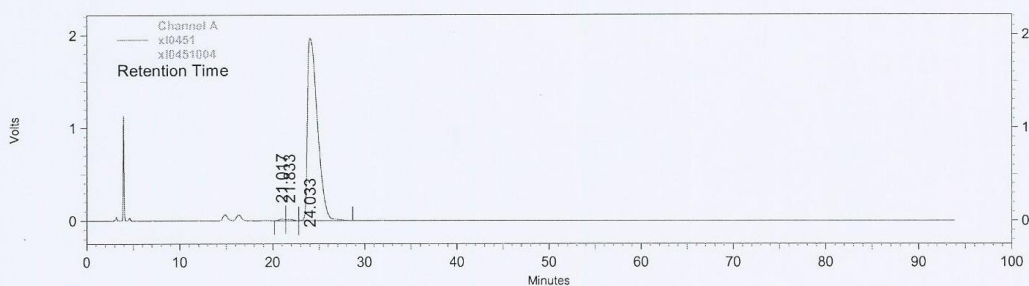

| Detector A (220nm) |                |           |          |         |          |
|--------------------|----------------|-----------|----------|---------|----------|
| Pk #               | Retention Time | Area      | Area %   | Height  | Height % |
| 1                  | ✓ 21.017       | 726459    | 0.486 ✓  | 17448   | 0.873    |
| 2                  | 21.833         | 717214    | 0.480    | 15123   | 0.756    |
| 3                  | 24.033         | 148073711 | 99.034 ✓ | 1996872 | 98.371   |
| Totals             |                | 149517384 | 100.000  | 1999443 | 100.000  |

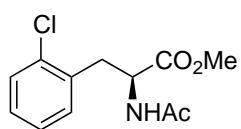

**17i**

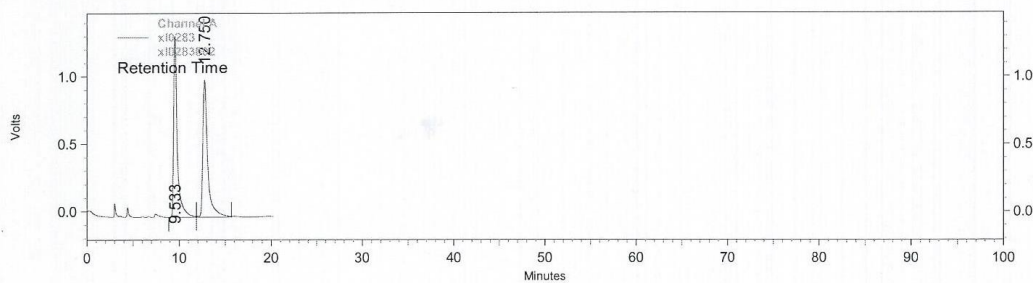

| Detector A (220nm) |                |          |         |         |          |
|--------------------|----------------|----------|---------|---------|----------|
| Pk #               | Retention Time | Area     | Area %  | Height  | Height % |
| 1                  | 9.533          | 36998543 | 49.678  | 1346372 | 57.003   |
| 2                  | 12.750         | 37478706 | 50.322  | 1015557 | 42.997   |
| Totals             |                | 74477249 | 100.000 | 2361929 | 100.000  |

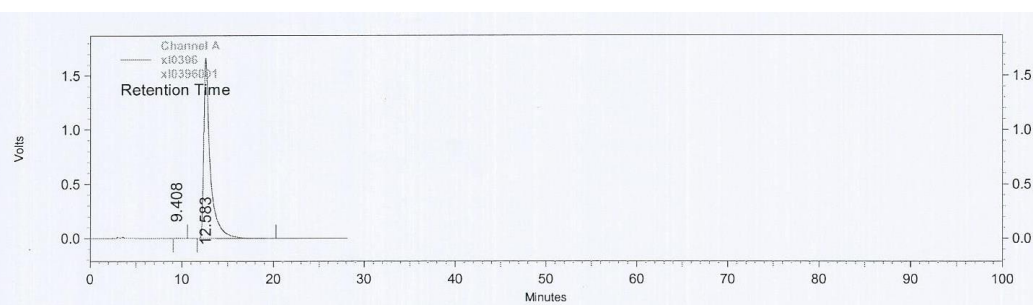

| Detector A (220nm) |                |          |         |         |          |
|--------------------|----------------|----------|---------|---------|----------|
| Pk #               | Retention Time | Area     | Area %  | Height  | Height % |
| 1                  | 9.408          | 130207   | 0.159   | 4008    | 0.240    |
| 2                  | 12.583         | 81890223 | 99.841  | 1664224 | 99.760   |
| Totals             |                | 82020430 | 100.000 | 1668232 | 100.000  |

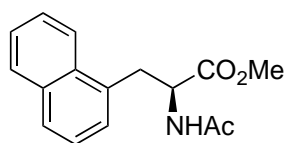

**17j**

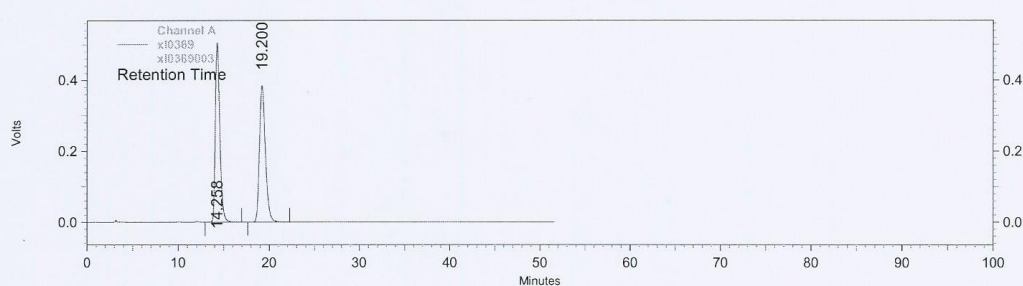

**Detector A (220nm)**

| Pk #   | Retention Time | Area     | Area %  | Height | Height % |
|--------|----------------|----------|---------|--------|----------|
| 1      | 14.258         | 17461334 | 49.827  | 505483 | 56.831   |
| 2      | 19.200         | 17582931 | 50.173  | 383966 | 43.169   |
| Totals |                | 35044265 | 100.000 | 889449 | 100.000  |

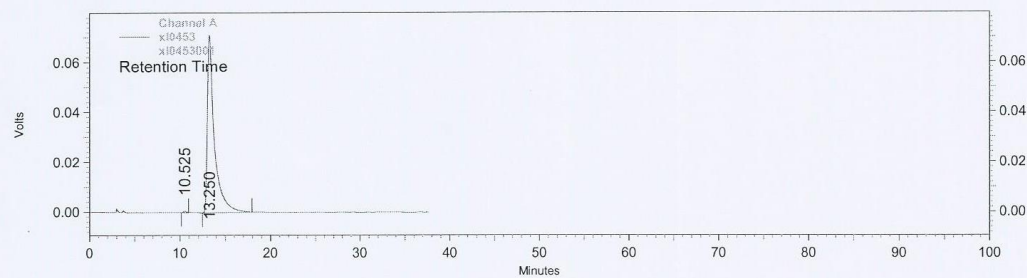

**Detector A (254nm)**

| Pk #   | Retention Time | Area    | Area %  | Height | Height % |
|--------|----------------|---------|---------|--------|----------|
| 1      | 10.525         | 16279   | 0.423   | 577    | 0.802    |
| 2      | 13.250         | 3827775 | 99.577  | 71342  | 99.198   |
| Totals |                | 3844054 | 100.000 | 71919  | 100.000  |



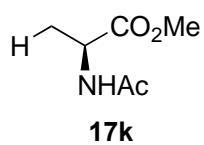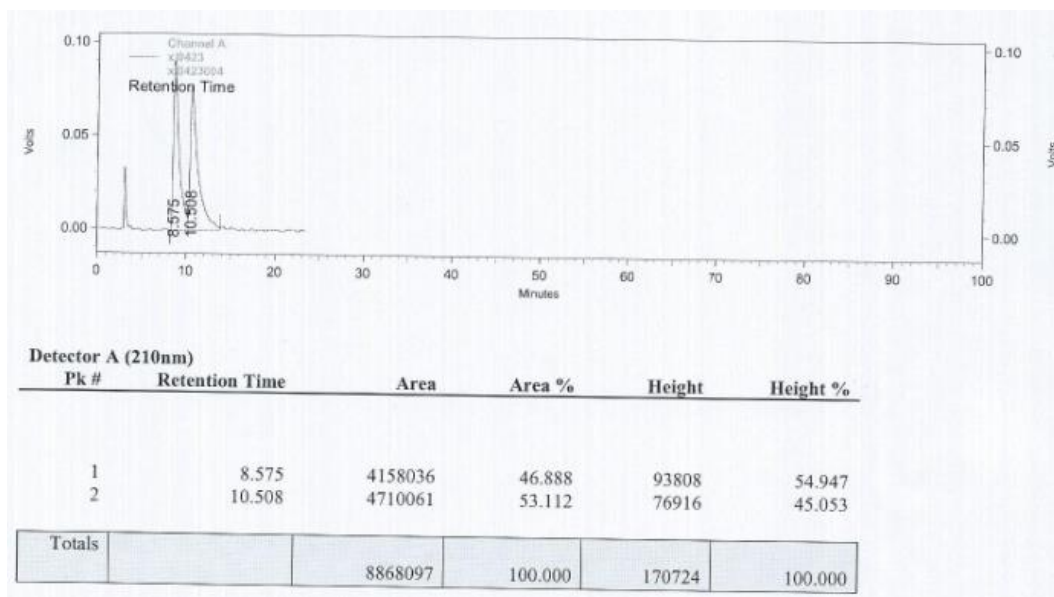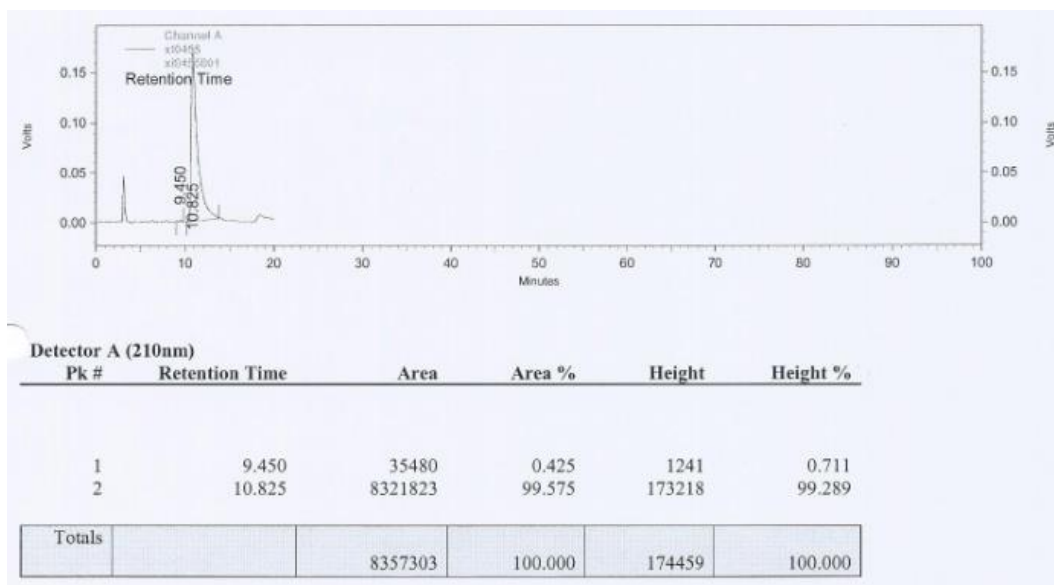

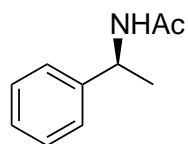

**19a**

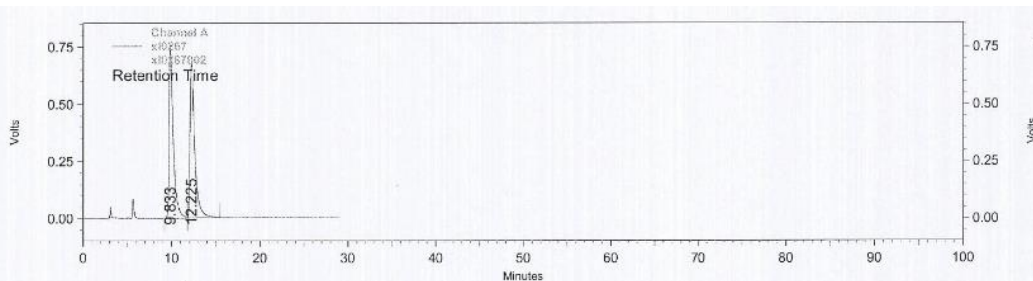

| Detector A (220nm) |                |          |         |         |          |
|--------------------|----------------|----------|---------|---------|----------|
| Pk #               | Retention Time | Area     | Area %  | Height  | Height % |
| 1                  | 9.833          | 24847348 | 49.782  | 759934  | 52.739   |
| 2                  | 12.225         | 25065435 | 50.218  | 681002  | 47.261   |
| Totals             |                | 49912783 | 100.000 | 1440936 | 100.000  |

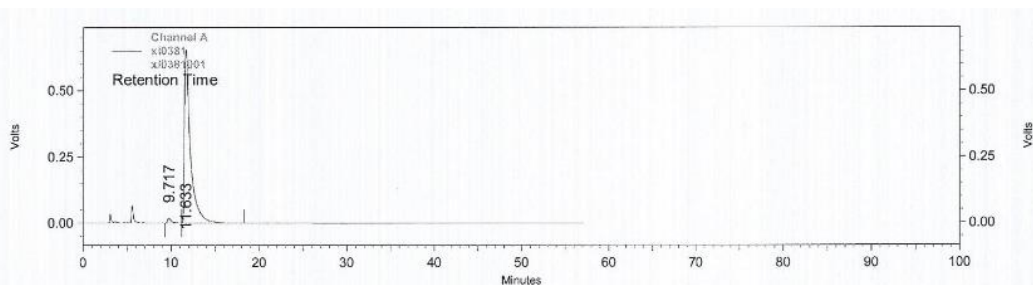

| Detector A (220nm) |                |          |         |        |          |
|--------------------|----------------|----------|---------|--------|----------|
| Pk #               | Retention Time | Area     | Area %  | Height | Height % |
| 1                  | 9.717          | 565978   | 1.791   | 18055  | 2.672    |
| 2                  | 11.633         | 31043172 | 98.209  | 657640 | 97.328   |
| Totals             |                | 31609150 | 100.000 | 675695 | 100.000  |



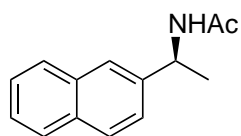

**19b**

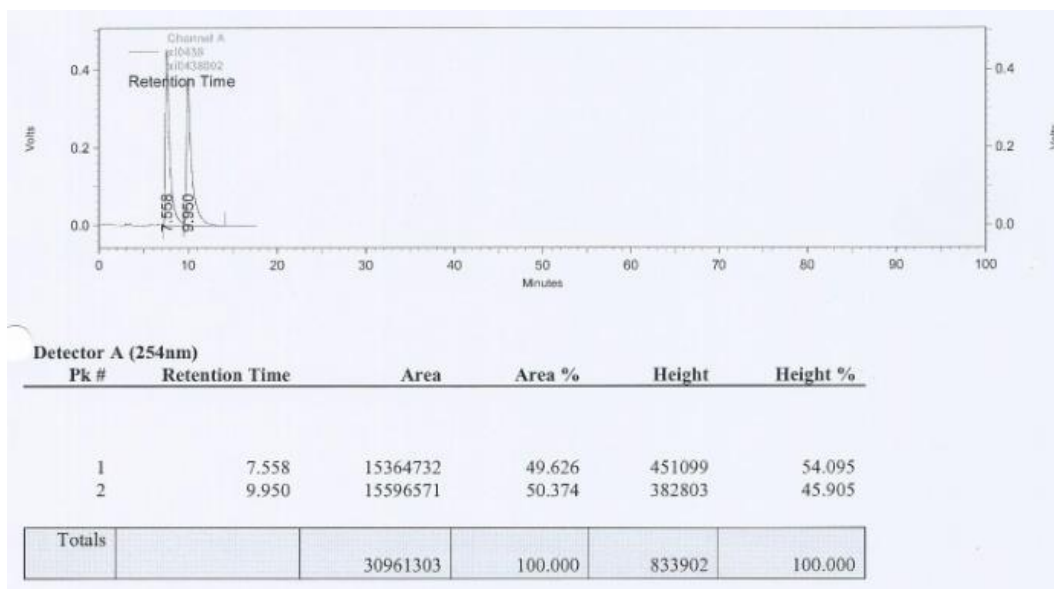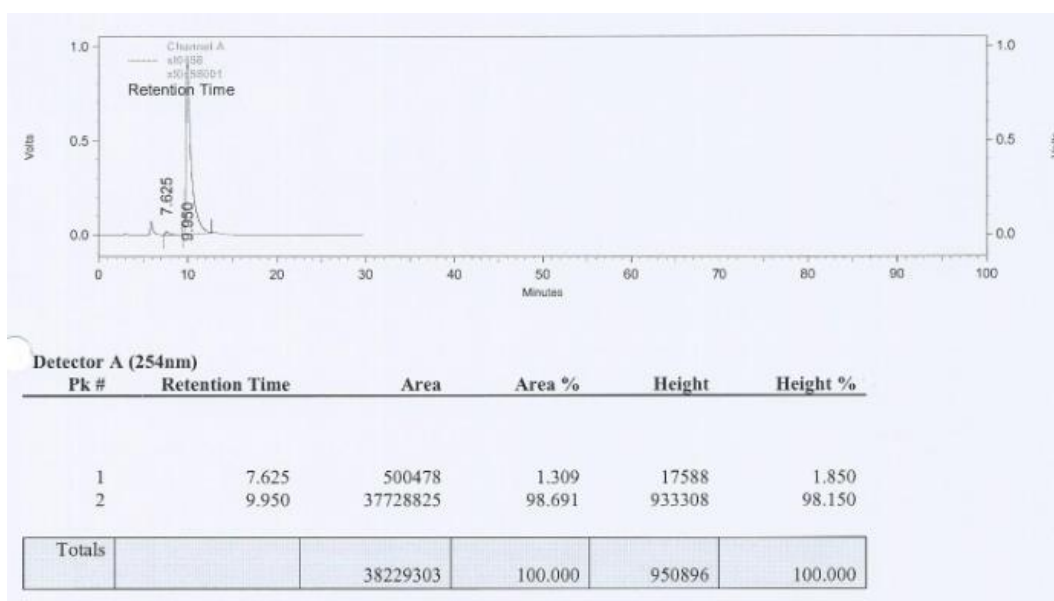

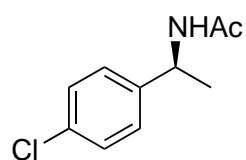

**19c**

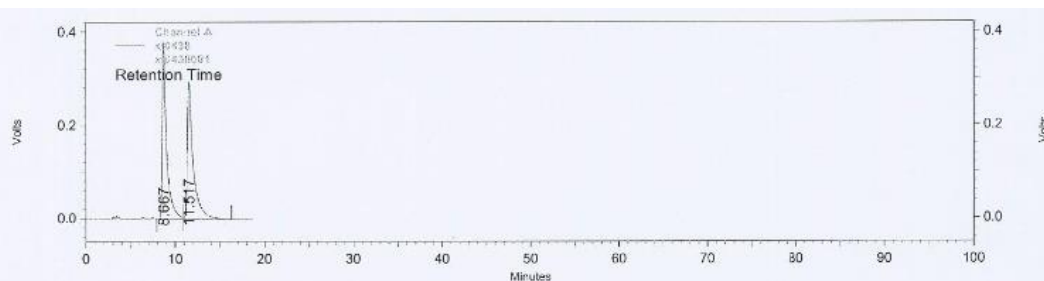

**Detector A (254nm)**

| Pk # | Retention Time | Area     | Area % | Height | Height % |
|------|----------------|----------|--------|--------|----------|
| 1    | 8.667          | 13432742 | 49.586 | 375088 | 56.105   |
| 2    | 11.517         | 13657216 | 50.414 | 293462 | 43.895   |

|        |  |          |         |        |         |
|--------|--|----------|---------|--------|---------|
| Totals |  | 27089958 | 100.000 | 668550 | 100.000 |
|--------|--|----------|---------|--------|---------|

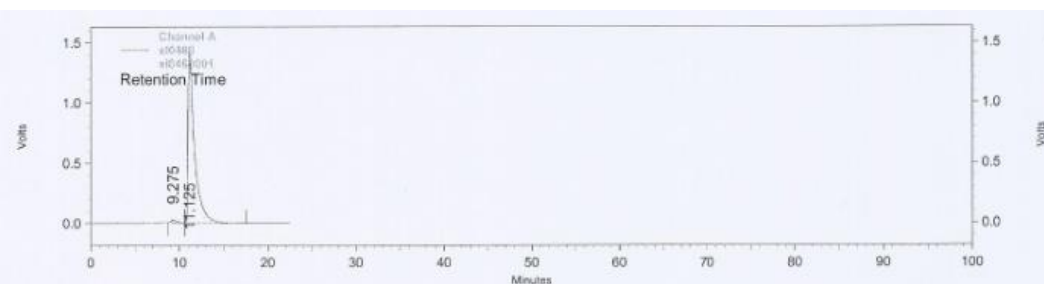

**Detector A (220nm)**

| Pk # | Retention Time | Area     | Area % | Height  | Height % |
|------|----------------|----------|--------|---------|----------|
| 1    | 9.275          | 866539   | 1.186  | 24482   | 1.666    |
| 2    | 11.125         | 72205768 | 98.814 | 1444973 | 98.334   |

|        |  |          |         |         |         |
|--------|--|----------|---------|---------|---------|
| Totals |  | 73072307 | 100.000 | 1469455 | 100.000 |
|--------|--|----------|---------|---------|---------|

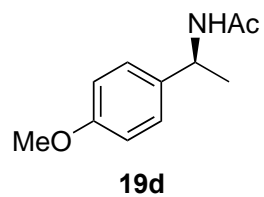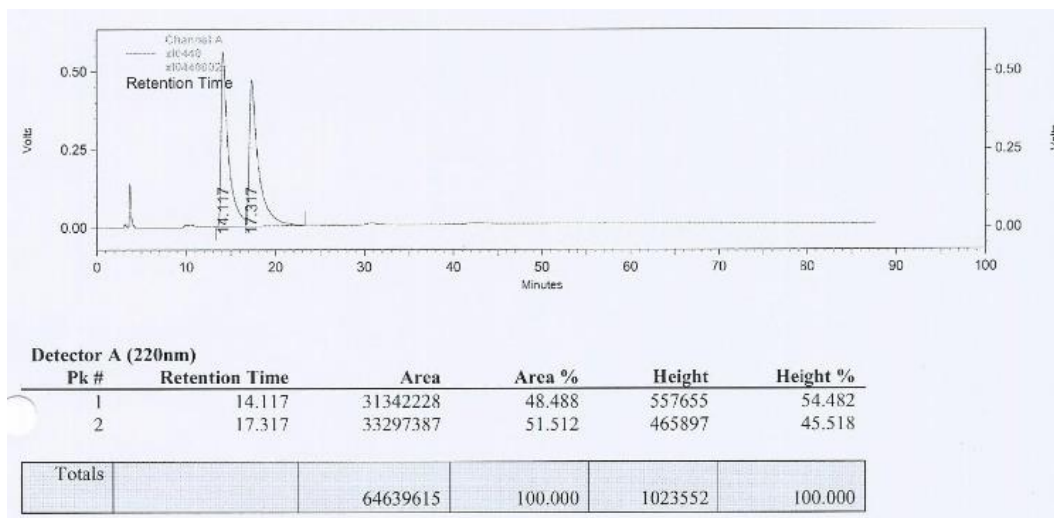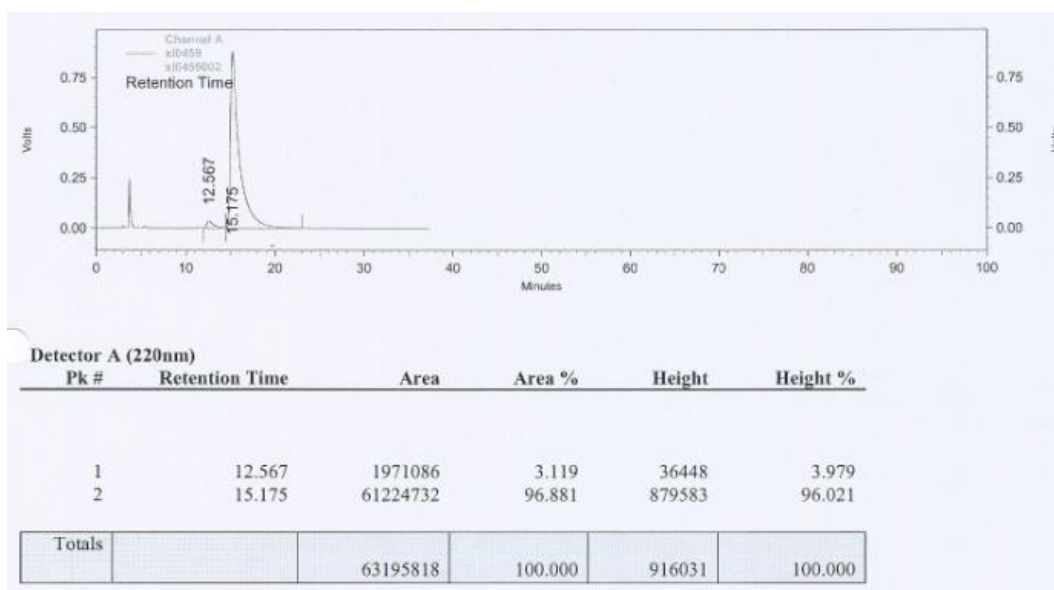

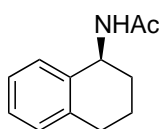

**19e**

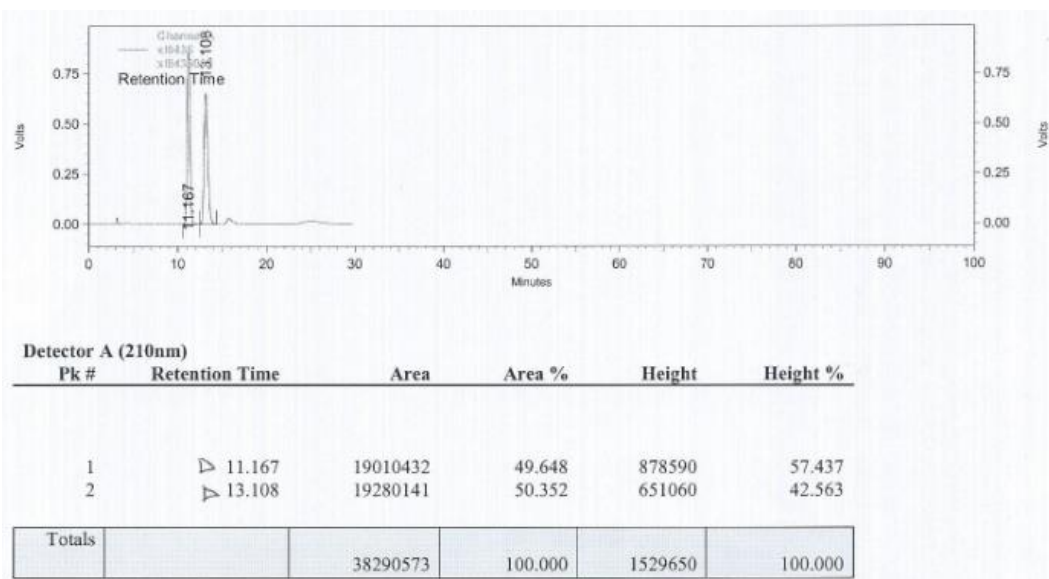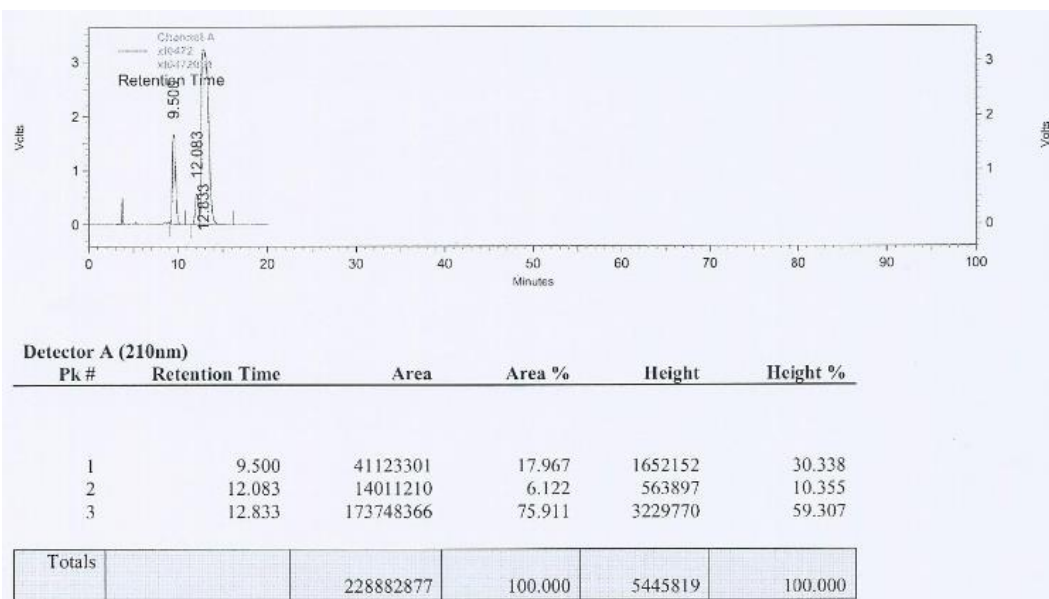

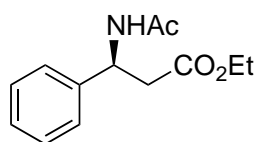

**19f**

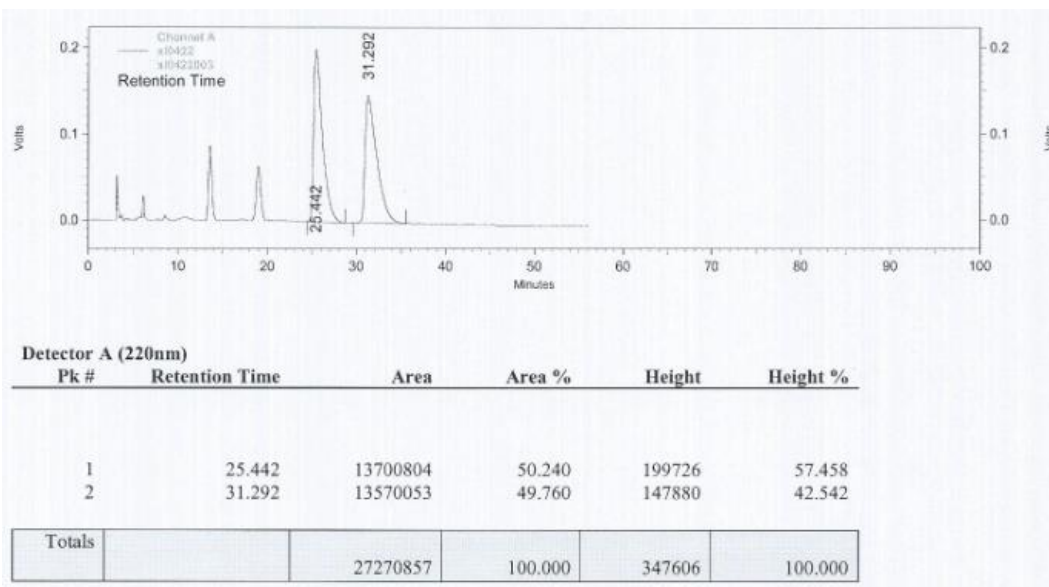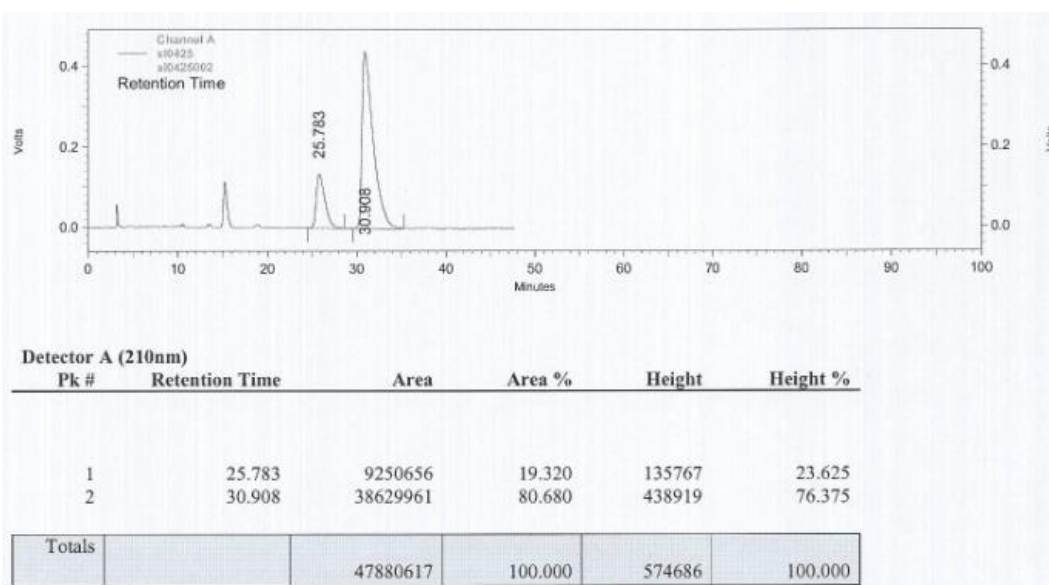

# <sup>1</sup>H NMR, <sup>13</sup>C NMR and <sup>31</sup>P NMR Spectra of New Compounds

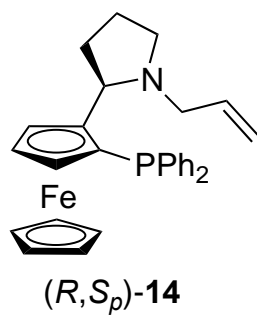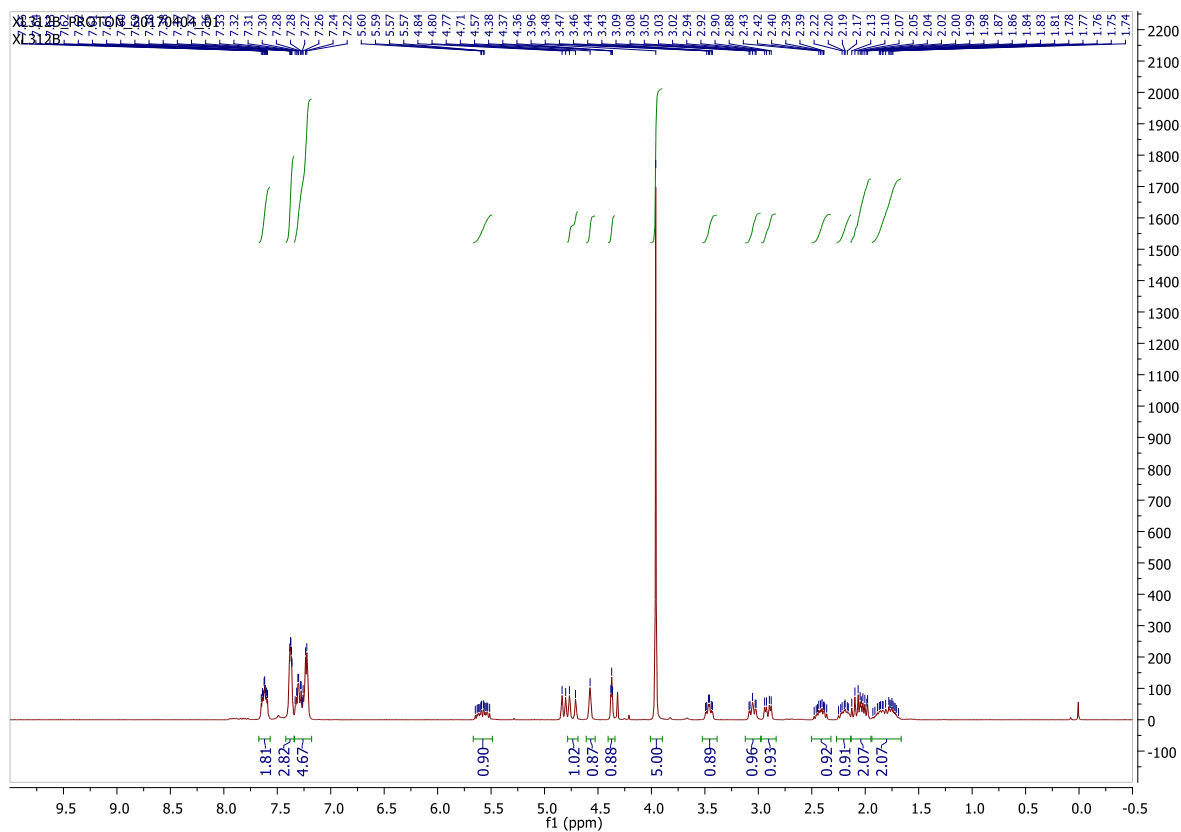

<sup>1</sup>H NMR Spectrum of (*R,S<sub>p</sub>*)-14

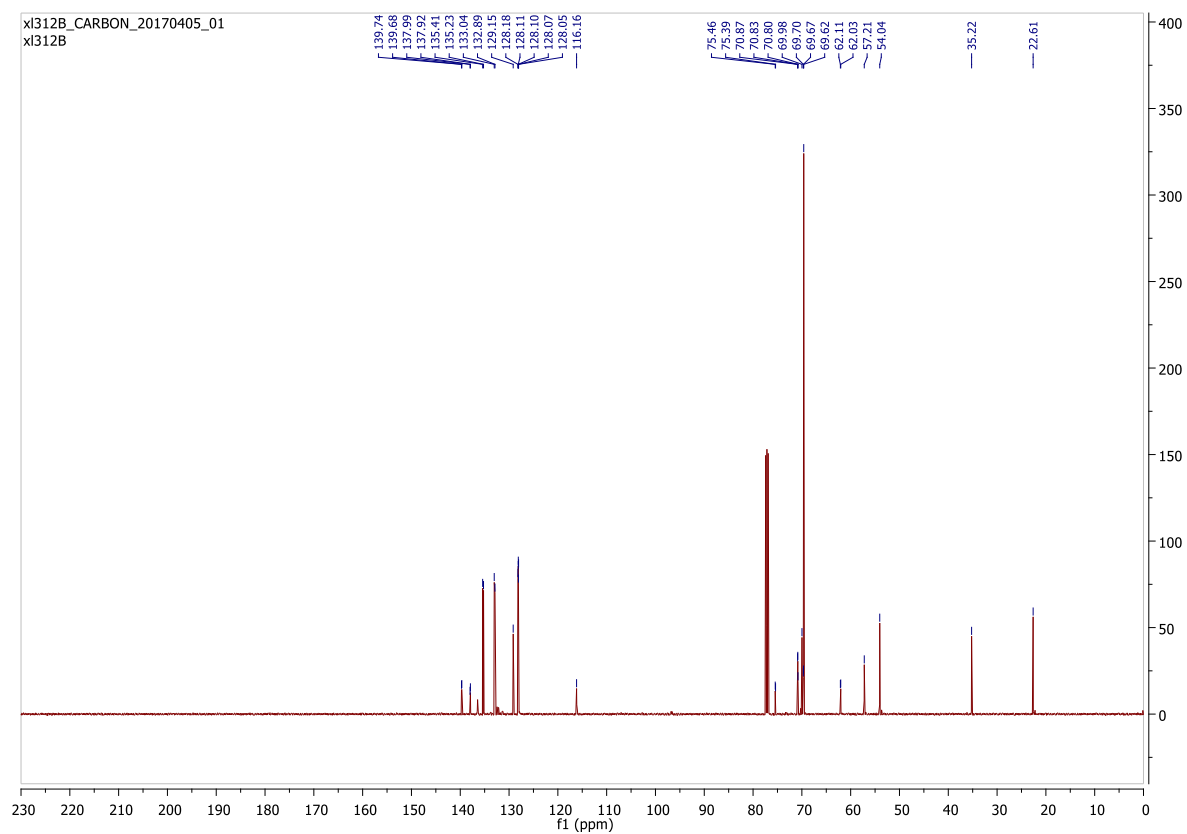

$^{13}\text{C}$  NMR Spectrum of (*R,Sp*)-**14**

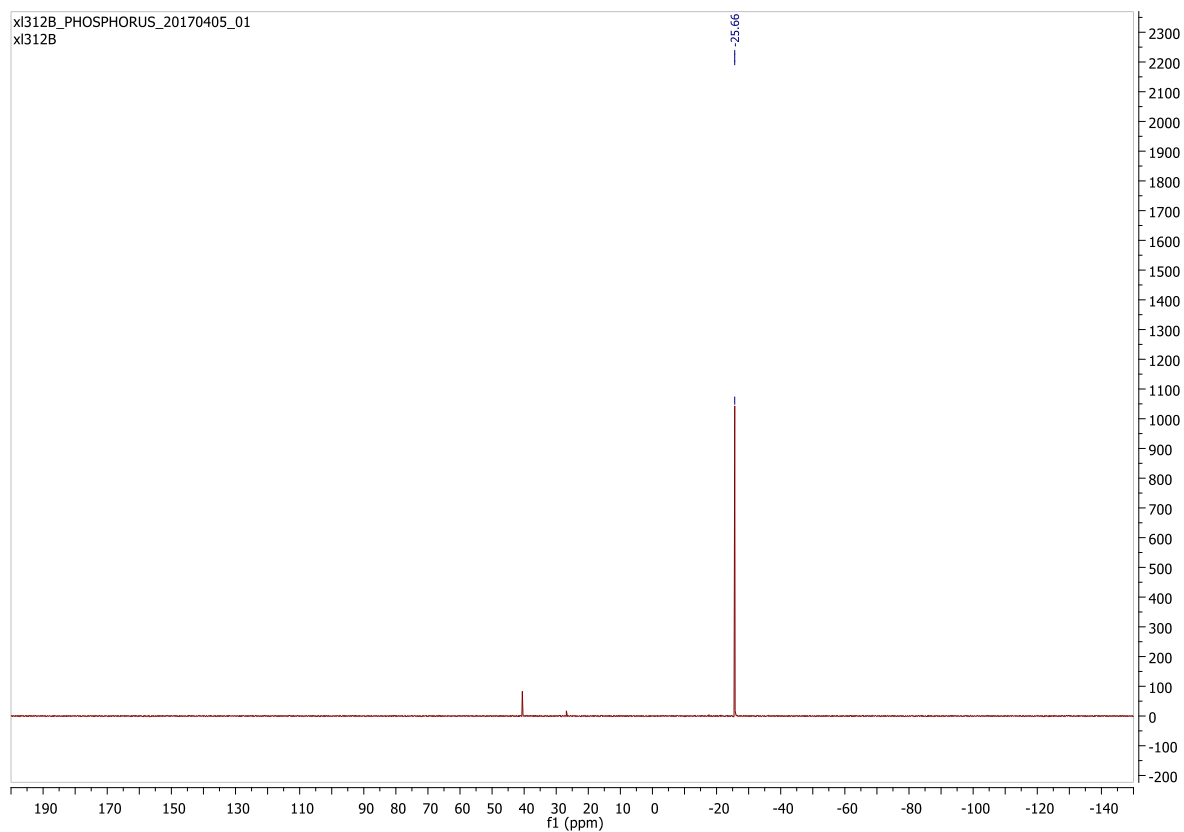

$^{31}\text{P}$  NMR Spectrum of (*R,Sp*)-**14**



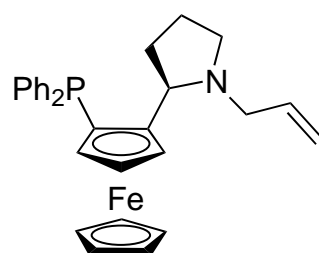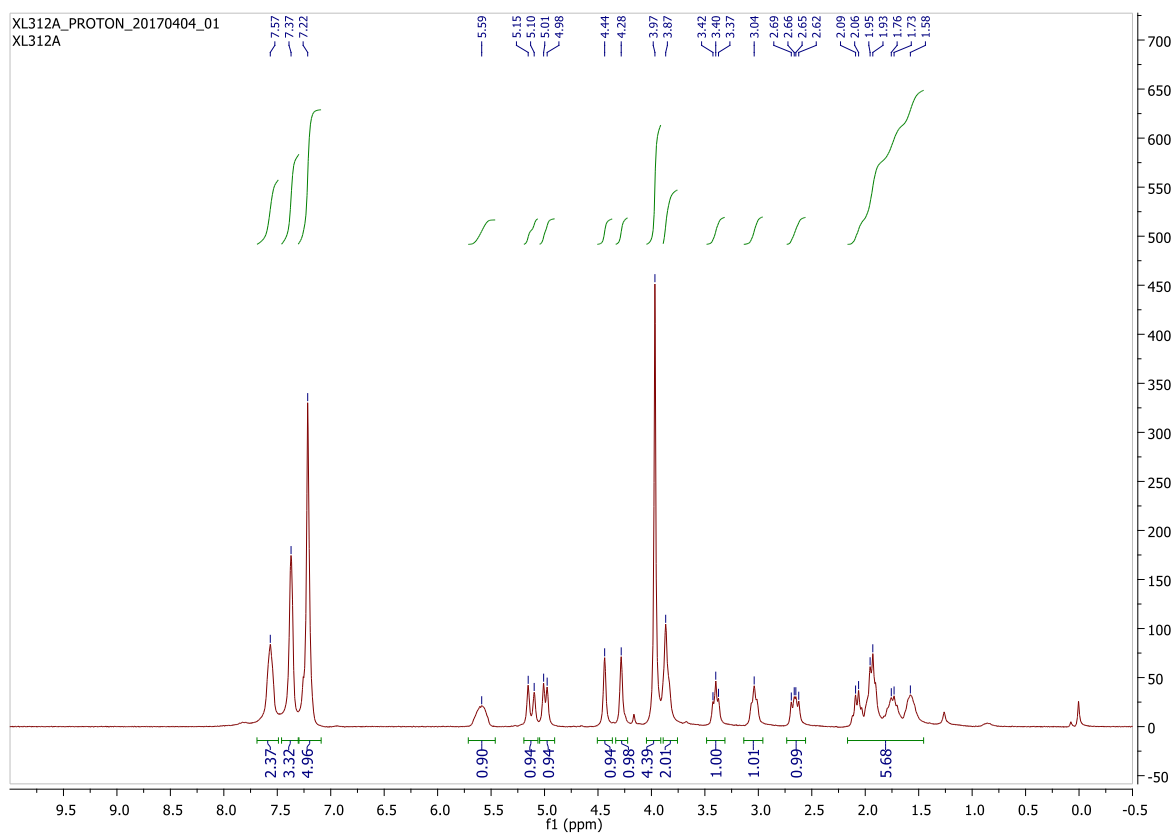

<sup>1</sup>H NMR Spectrum of (*R,R*)-**14**

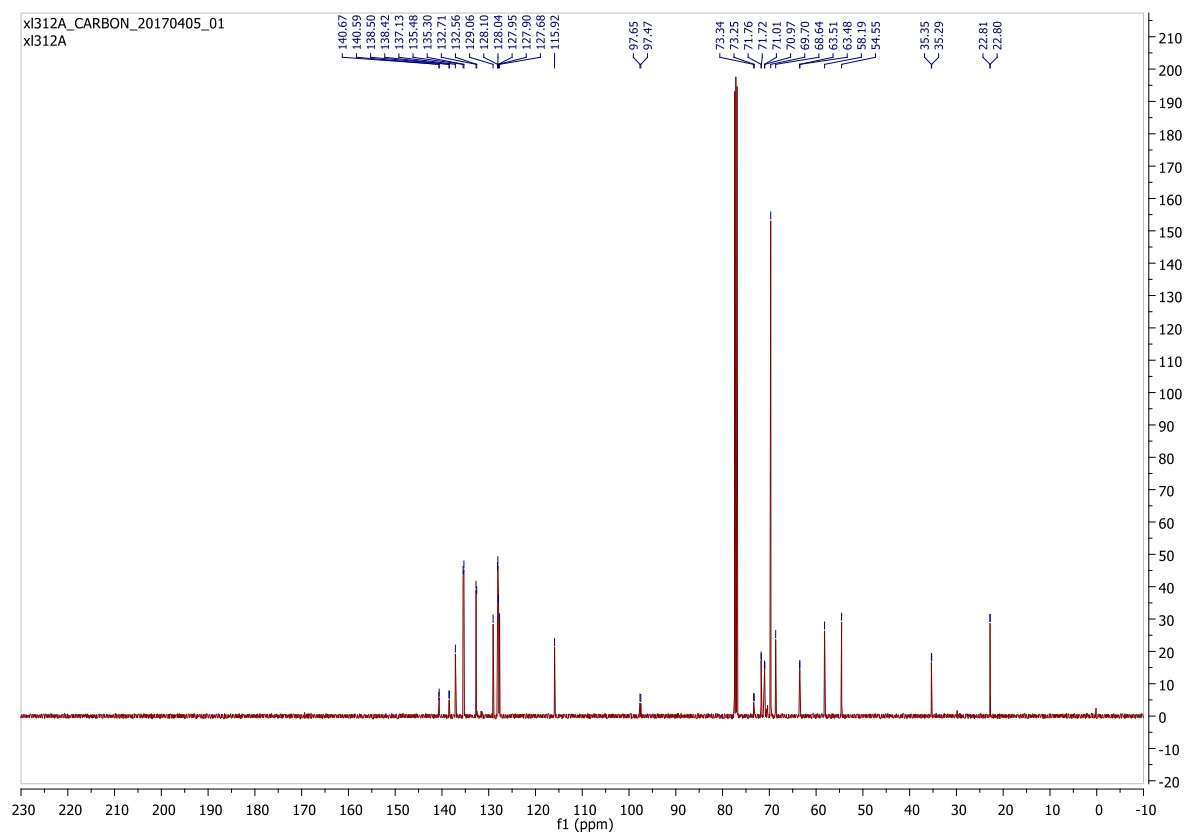

$^{13}\text{C}$  NMR Spectrum of (*R,Rp*)-**14**

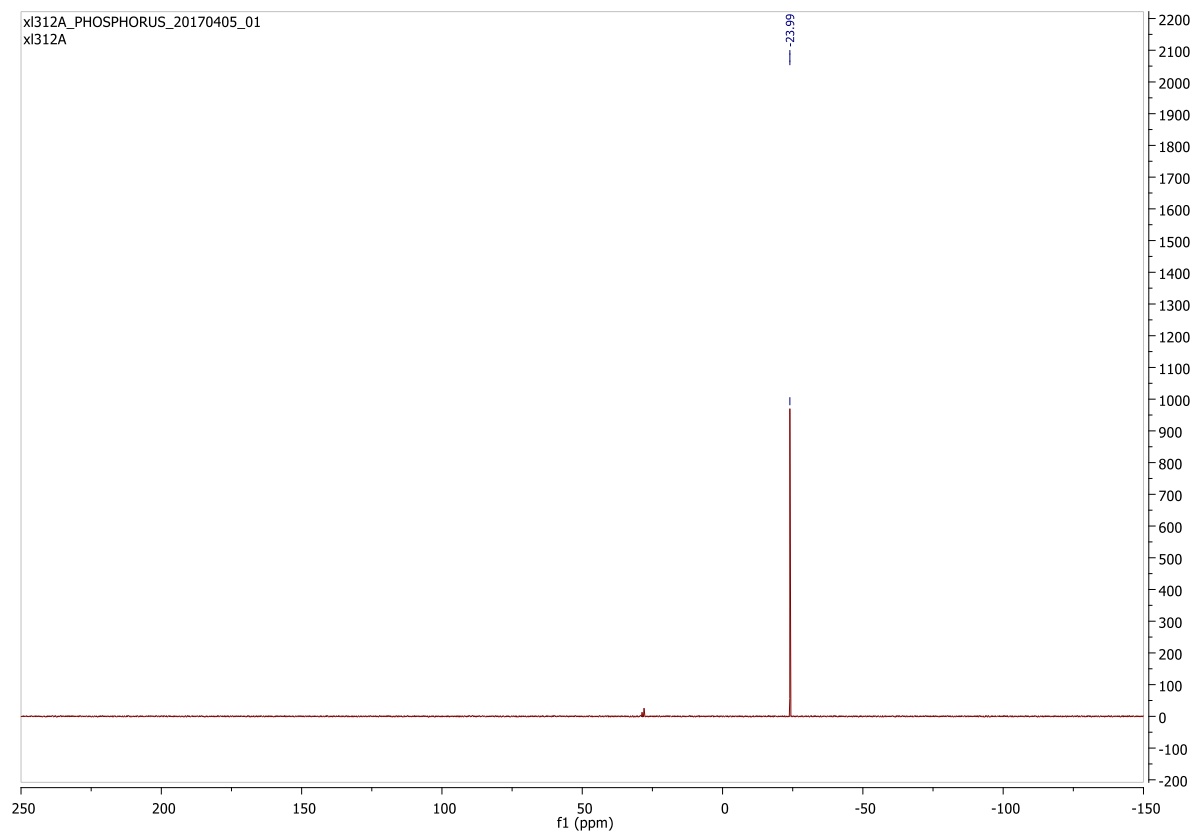

$^{31}\text{P}$  NMR Spectrum of (*R,Rp*)-**14**

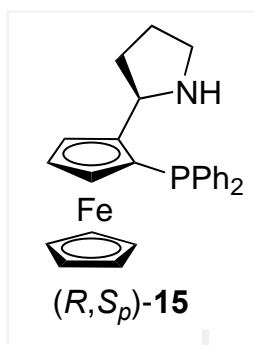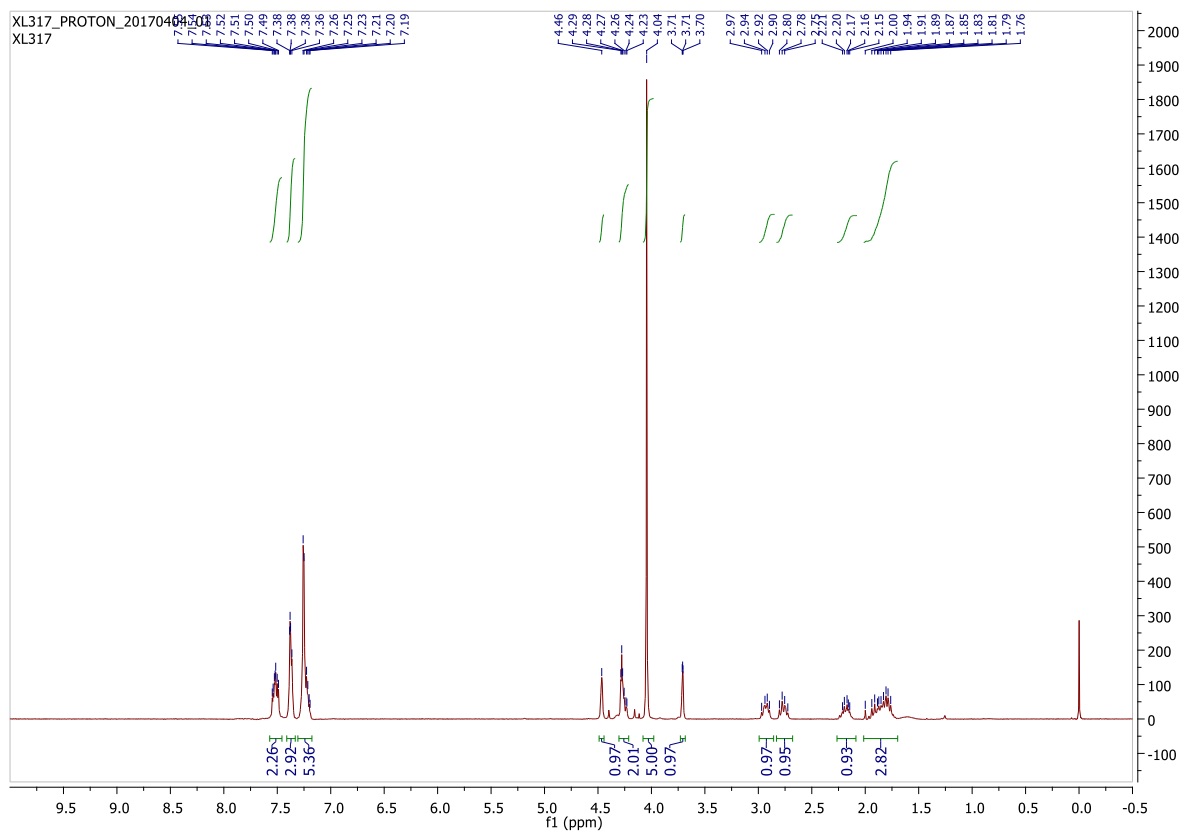

<sup>1</sup>H NMR Spectrum of (*R,S\_p*)-15

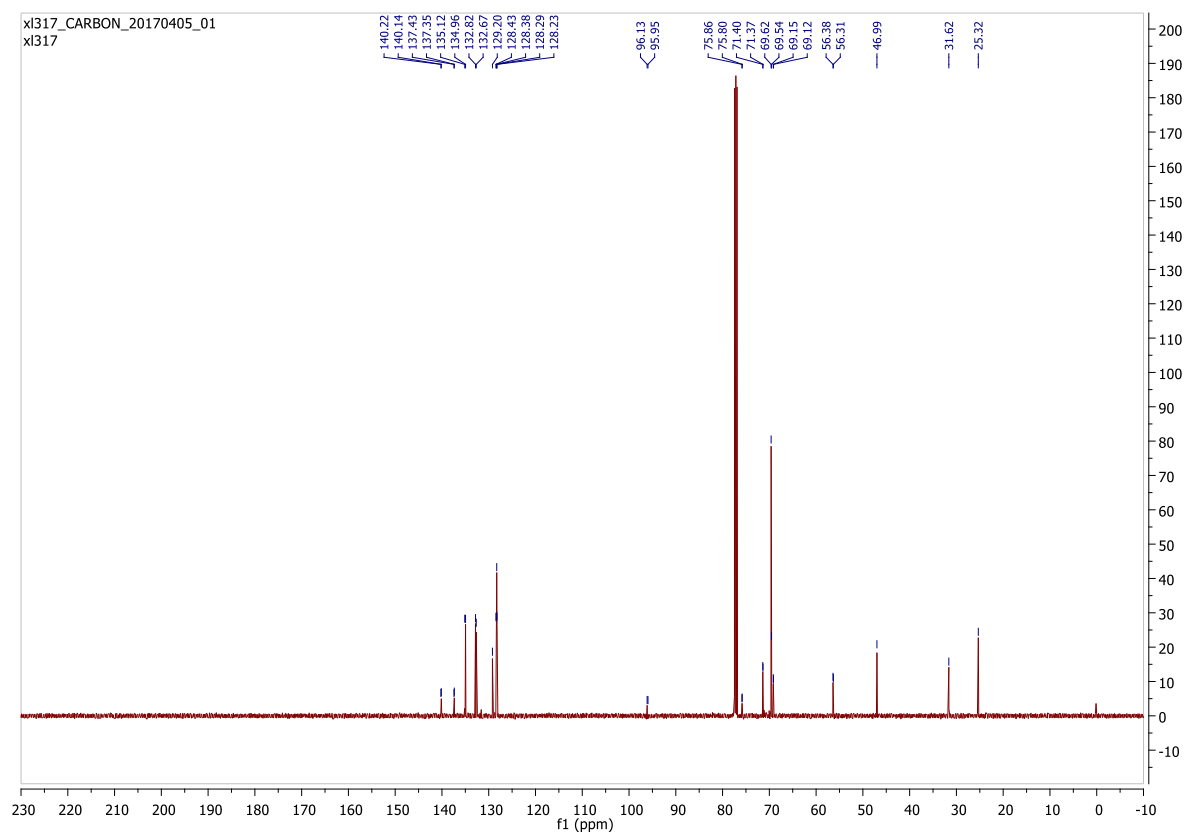

$^{13}\text{C}$  NMR Spectrum of (*R,S*)-**15**

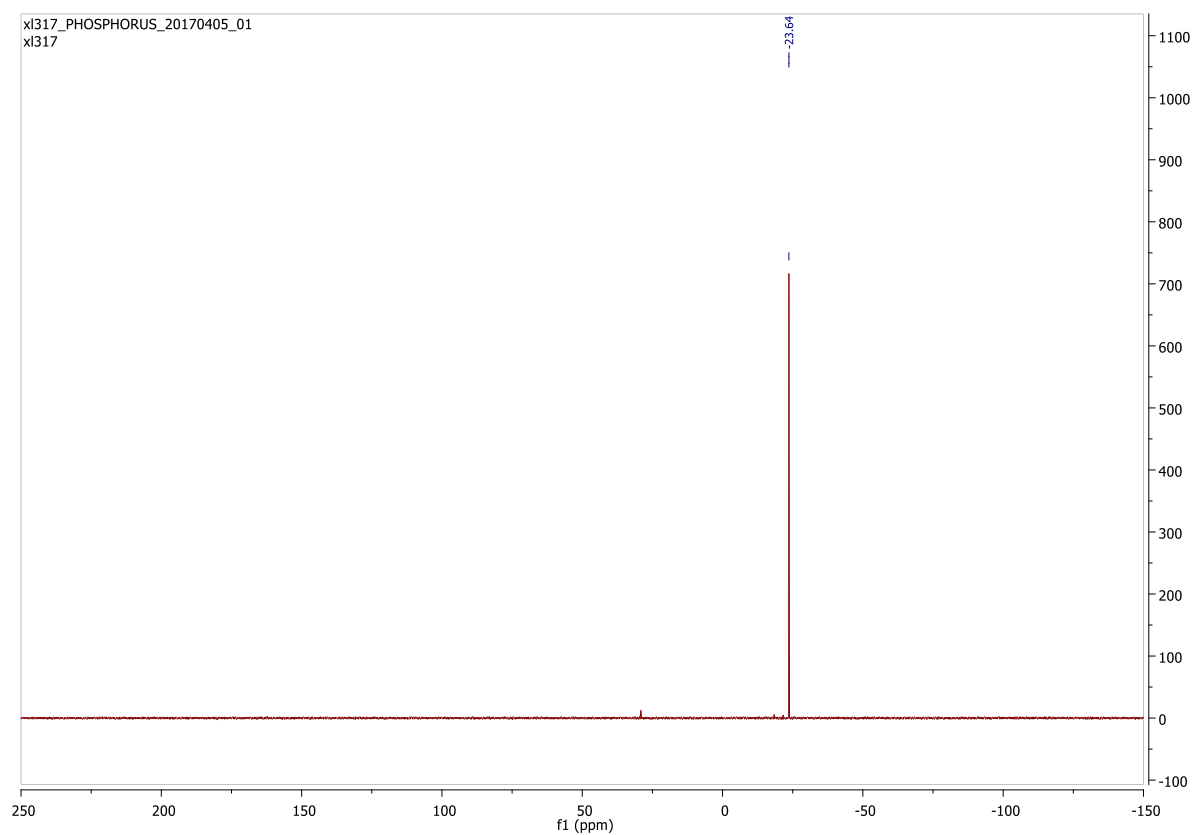

$^{31}\text{P}$  NMR Spectrum of (*R,S*)-**15**

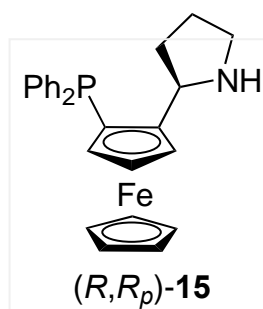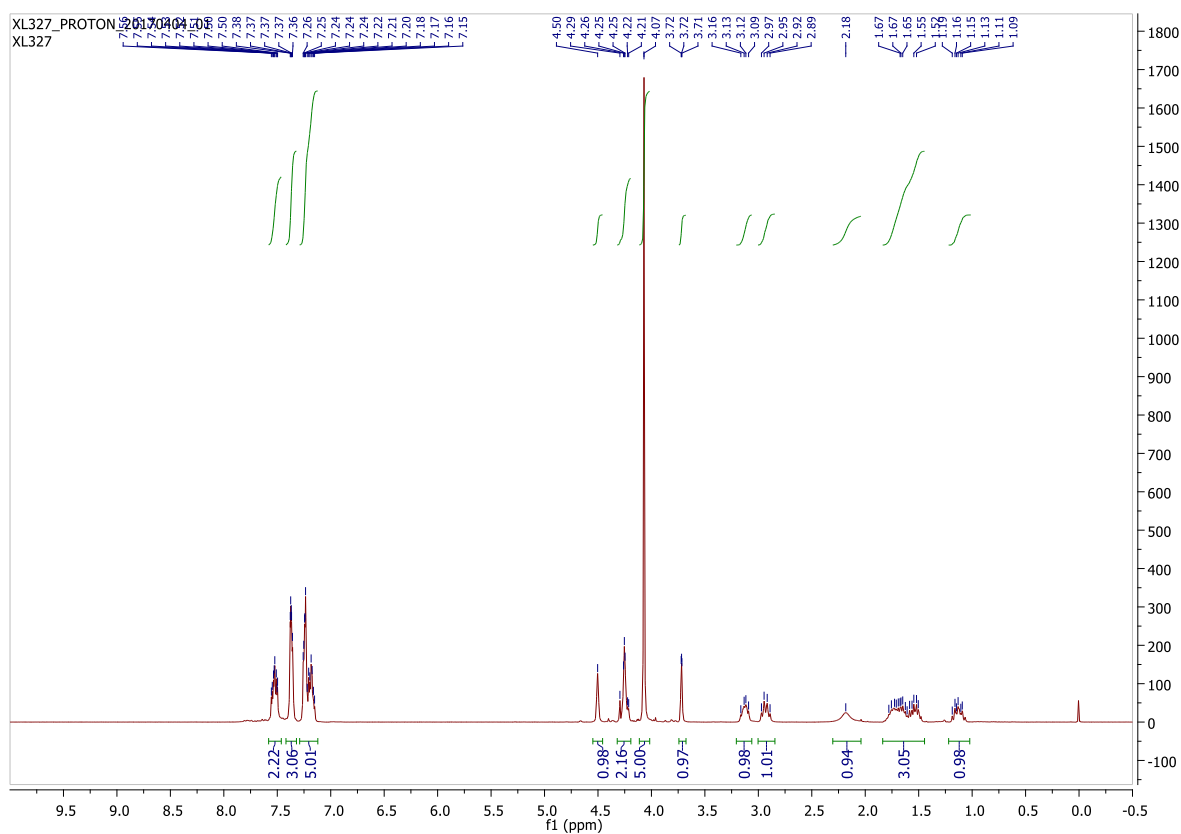

<sup>1</sup>H NMR Spectrum of (*R,R\_p*)-15

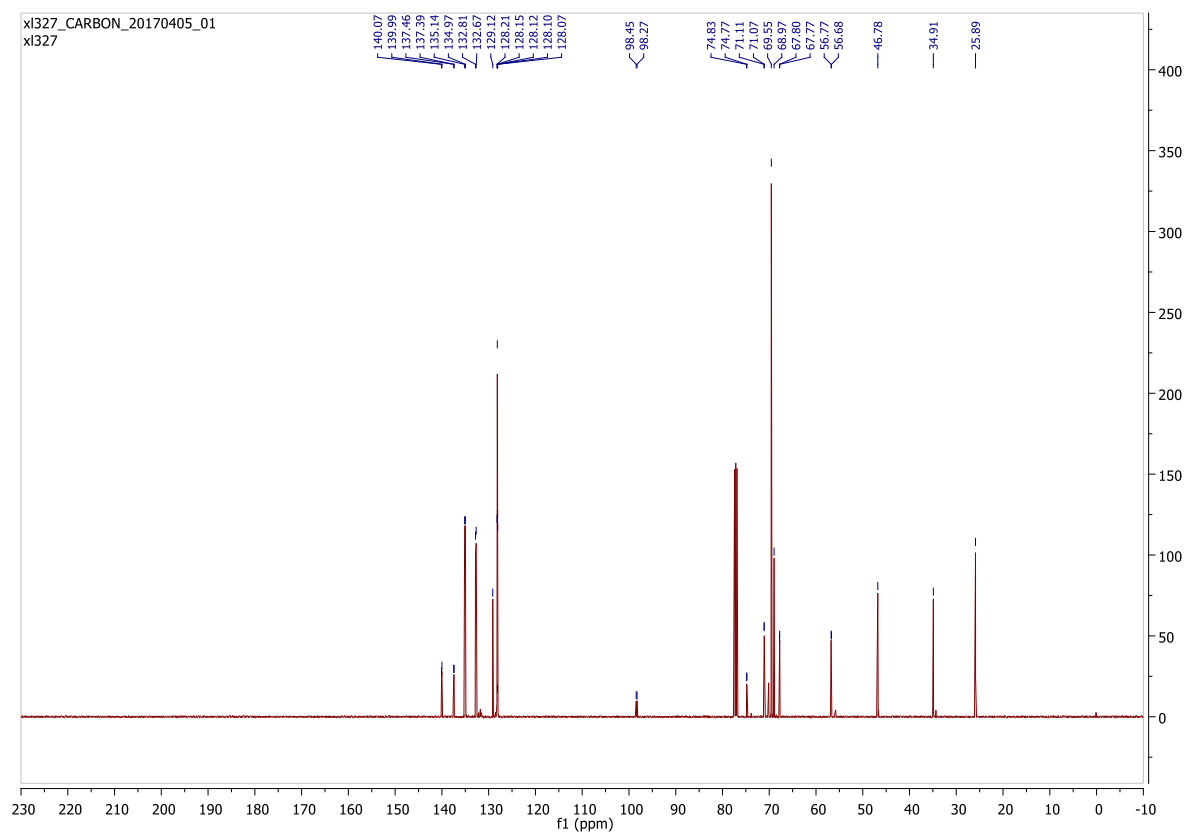

$^{13}\text{C}$  NMR Spectrum of (*R,Rp*)-**15**

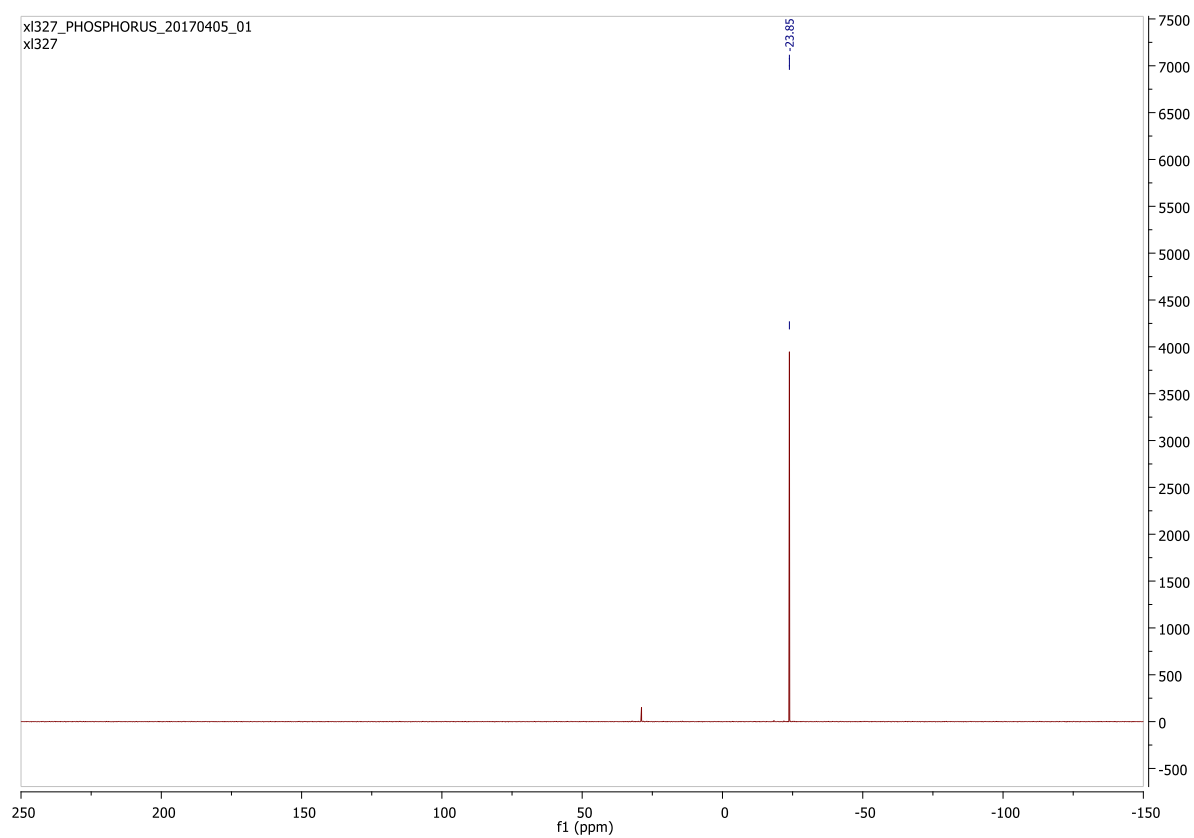

$^{31}\text{P}$  NMR Spectrum of (*R,Rp*)-**15**

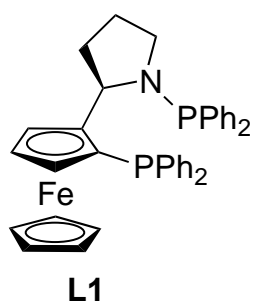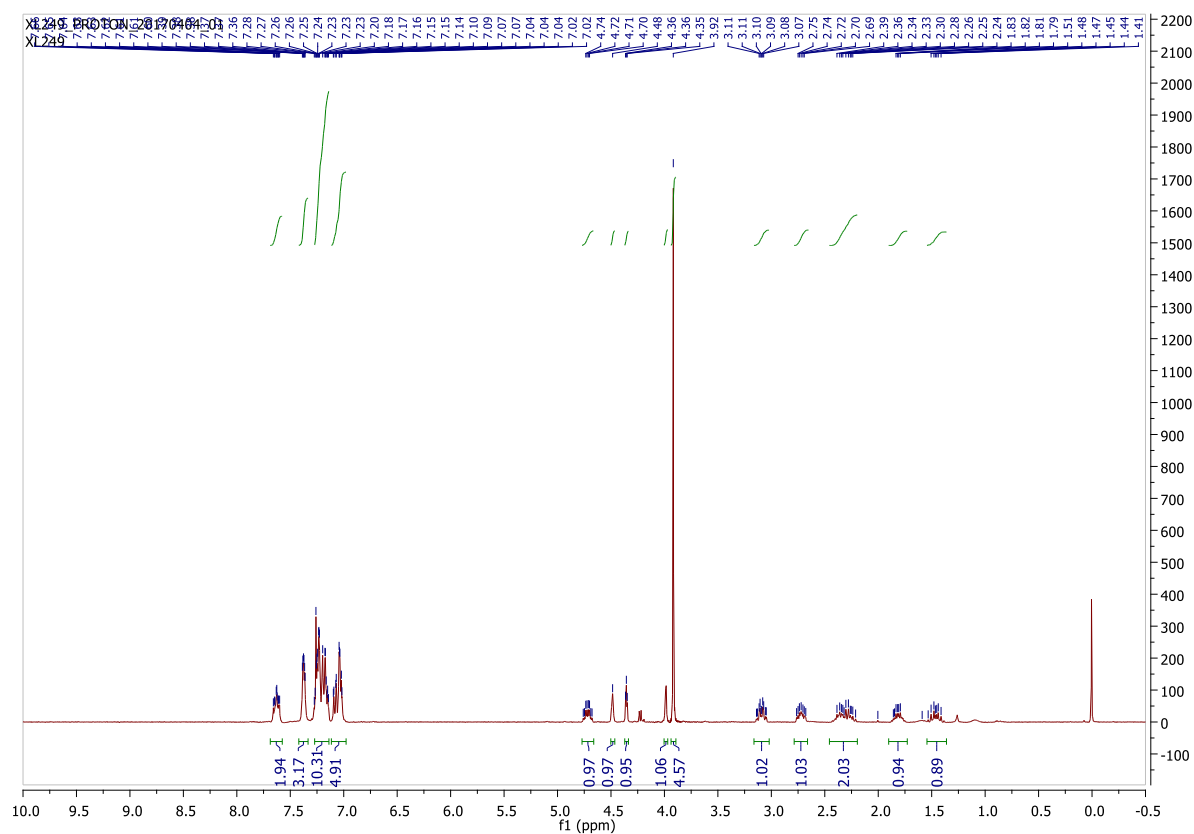

<sup>1</sup>H NMR Spectrum of ligand L1



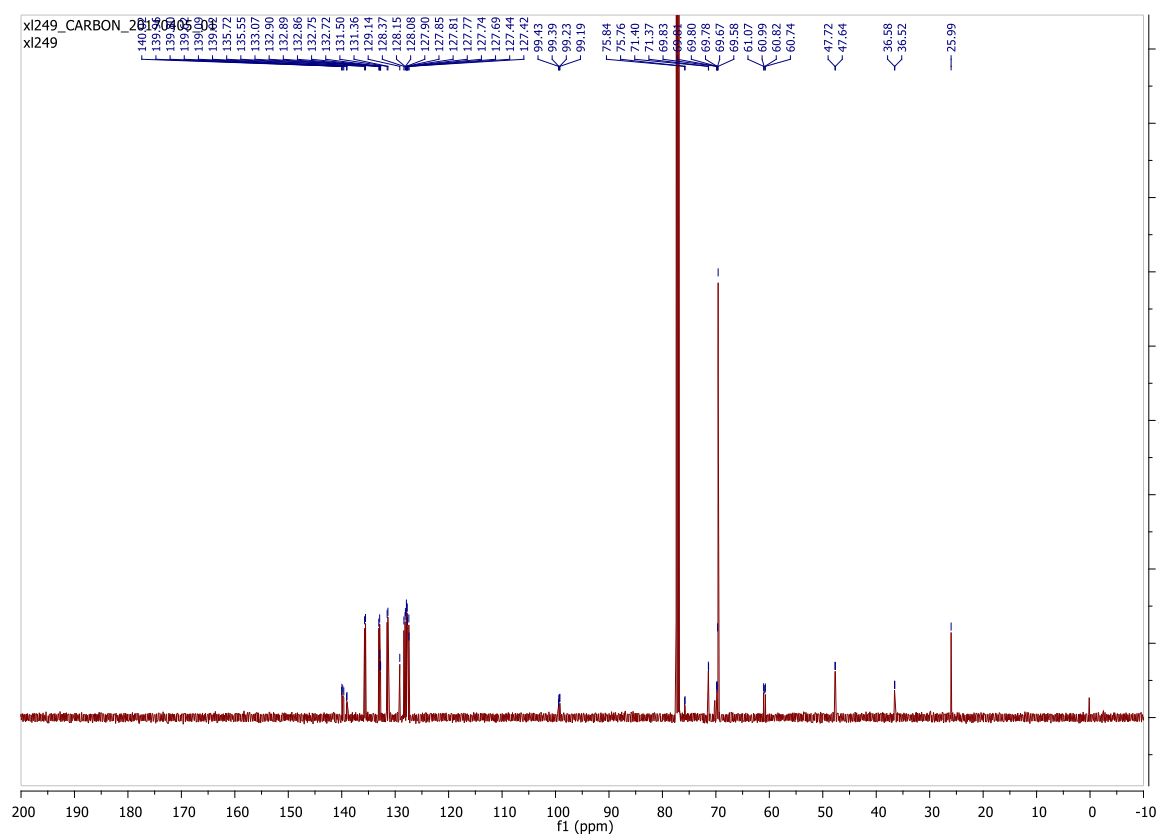

$^{13}\text{C}$  NMR Spectrum of ligand **L1**

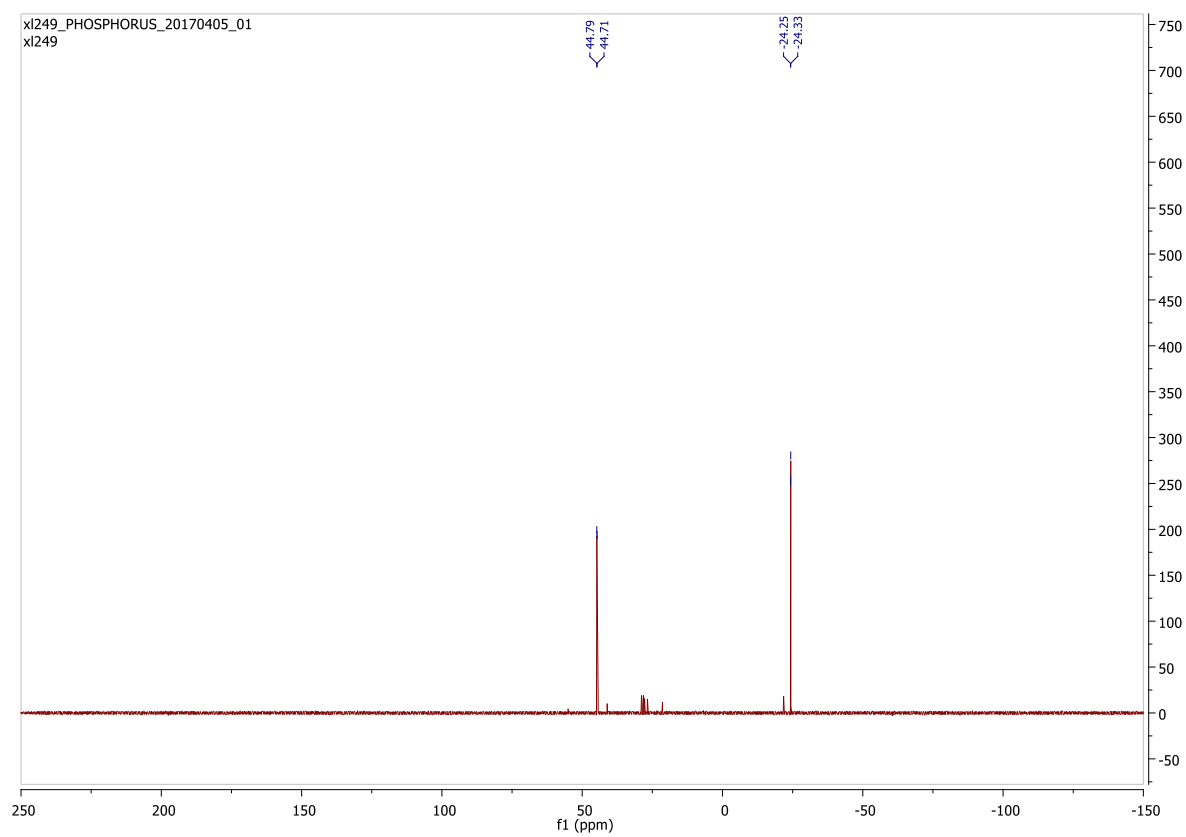

$^{31}\text{P}$  NMR Spectrum of ligand **L1**

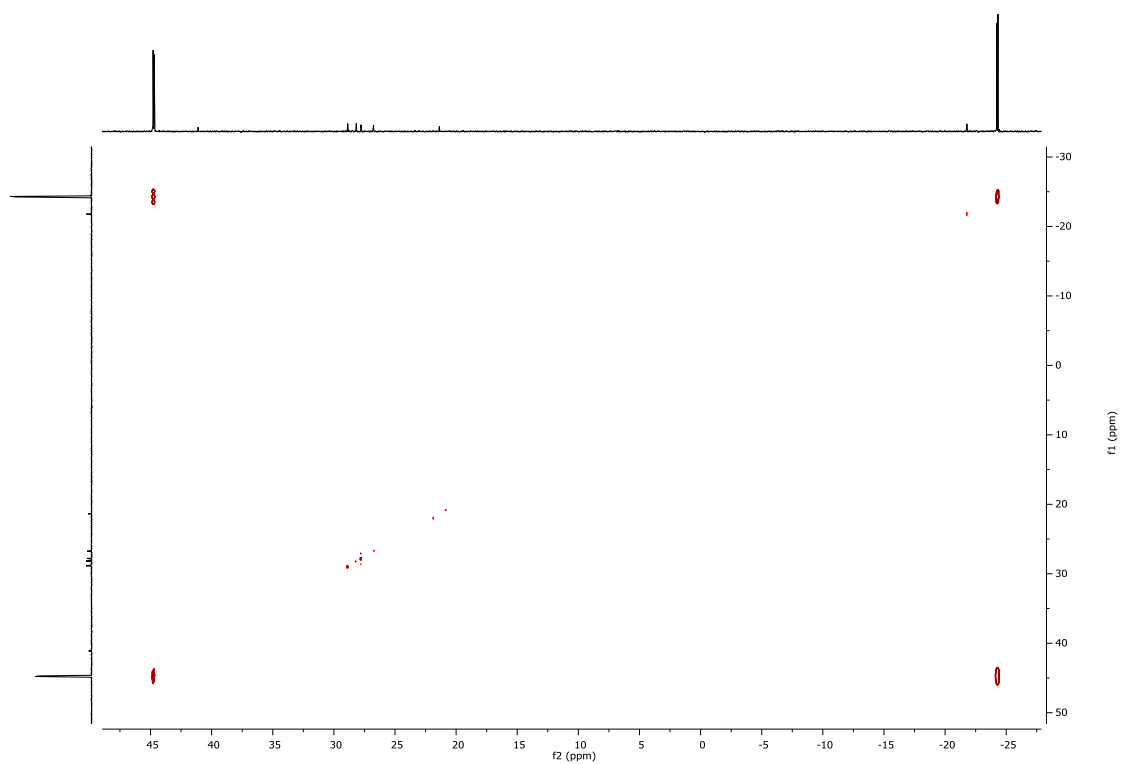

$^{31}\text{P}$ - $^{31}\text{P}$  COSY of Ligand **L1**

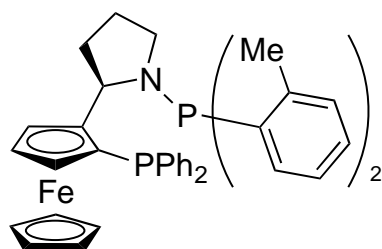

**L2**

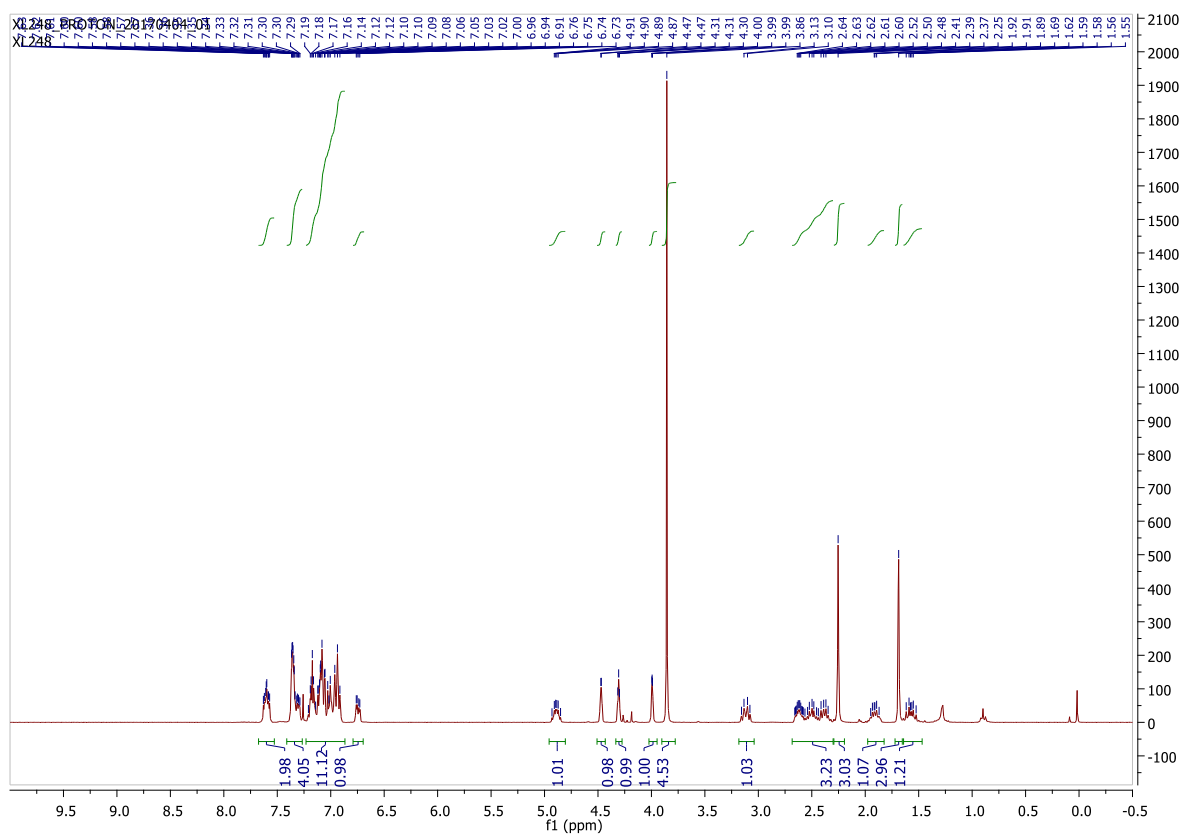

**<sup>1</sup>H NMR Spectrum of ligand L2**

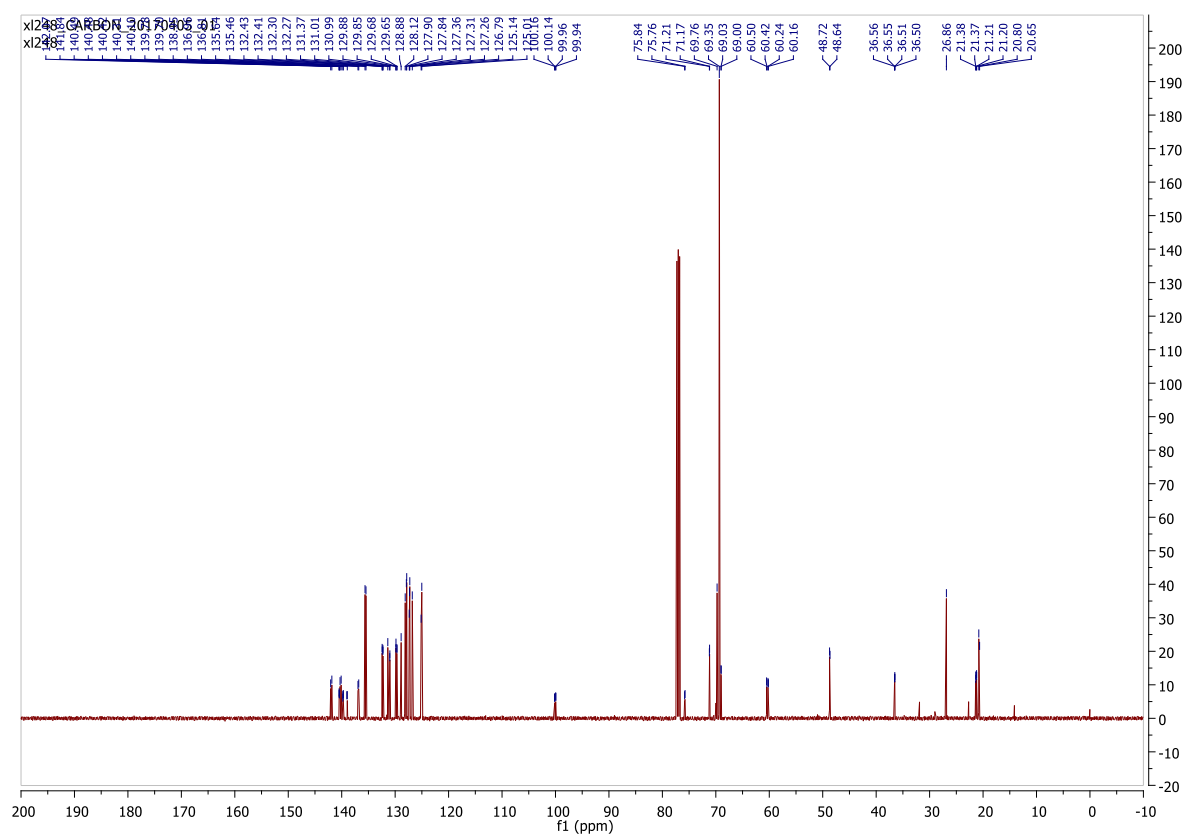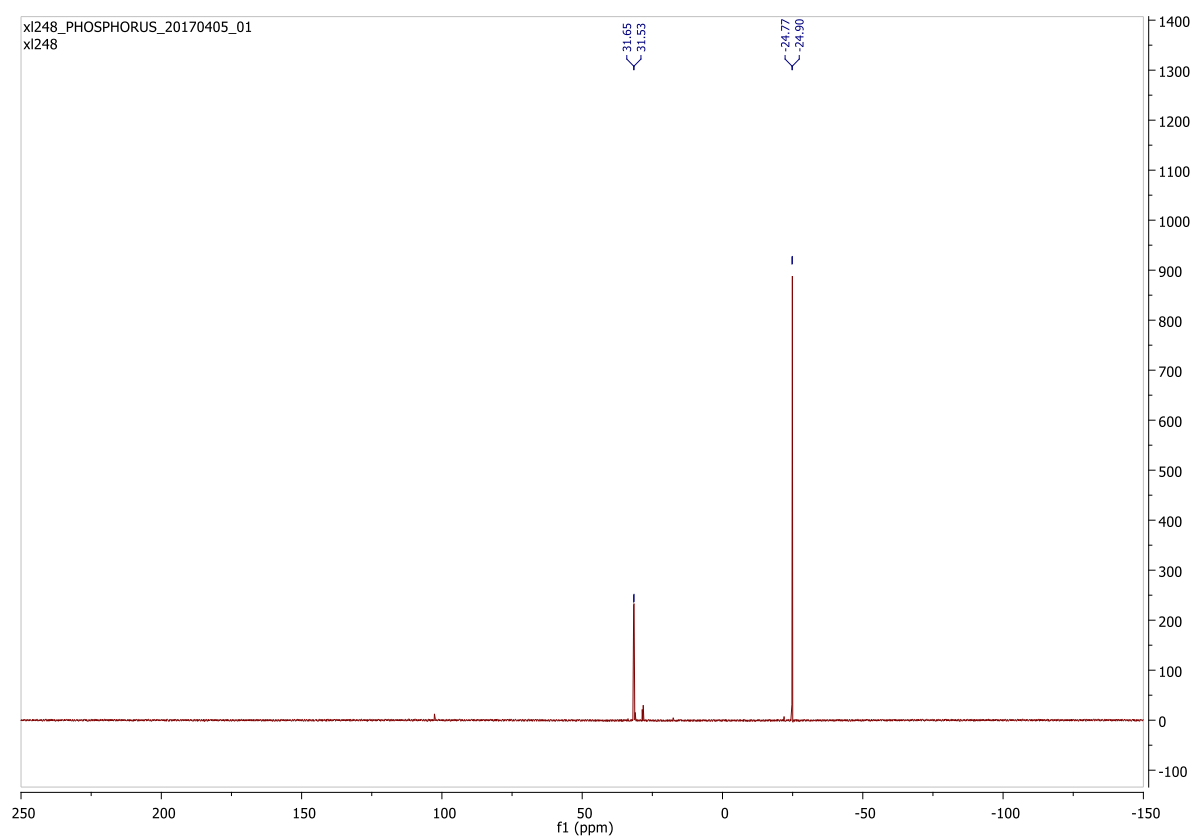

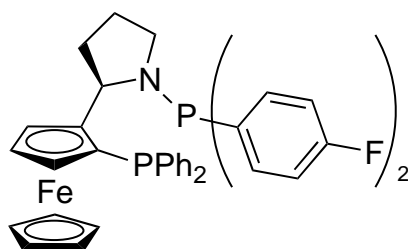

**L3**

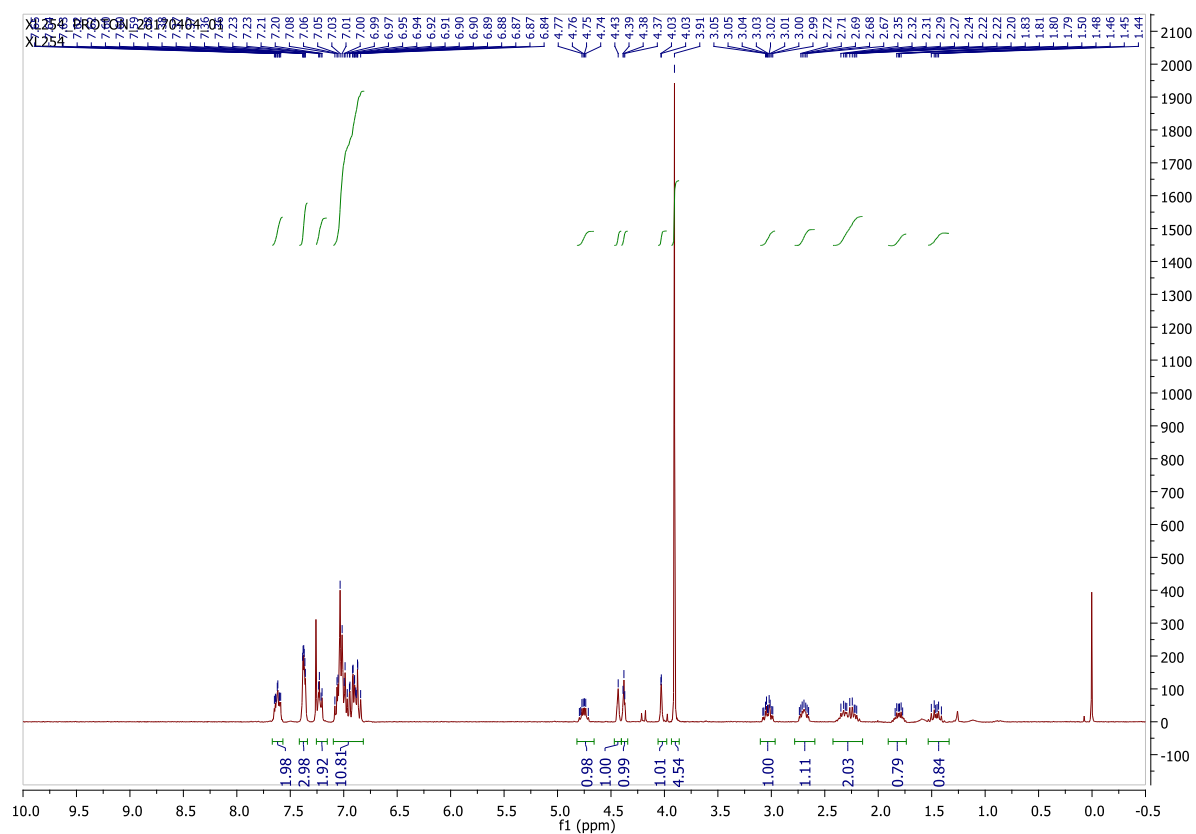

**<sup>1</sup>H NMR Spectrum of ligand L3**

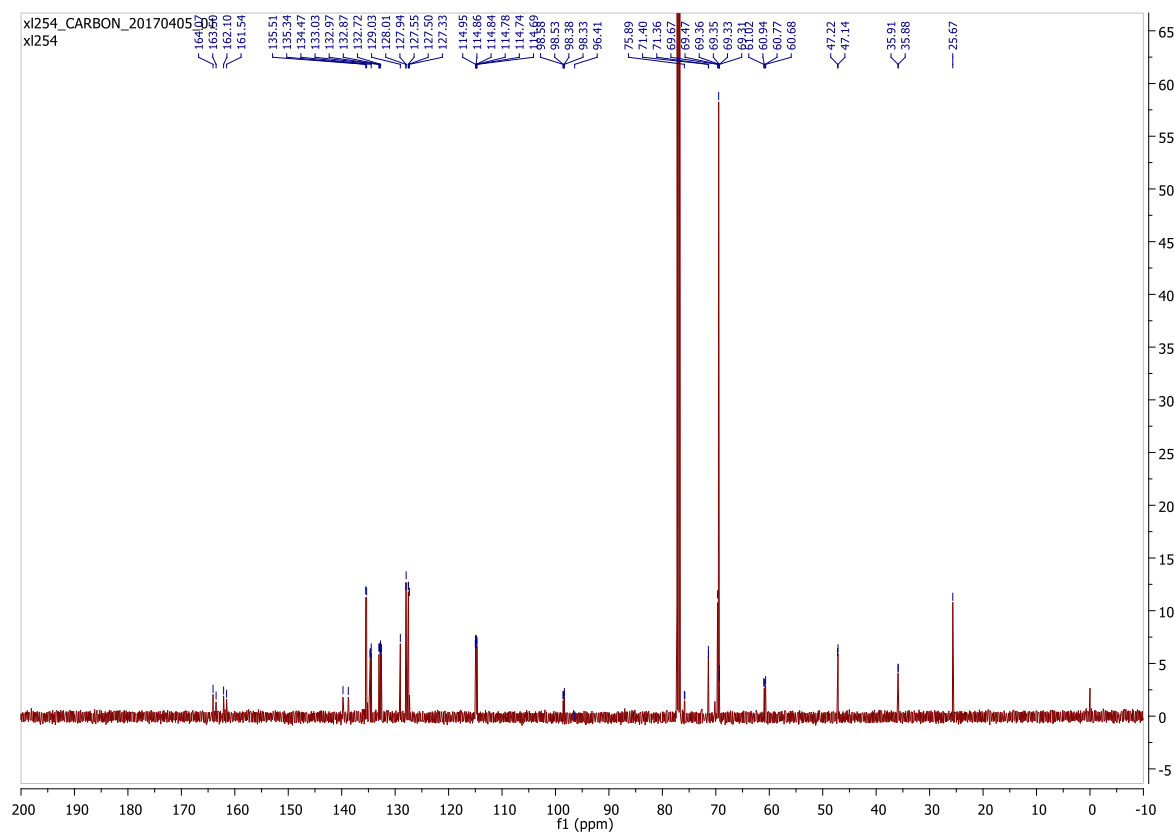

$^{13}\text{C}$  NMR Spectrum of ligand **L3**

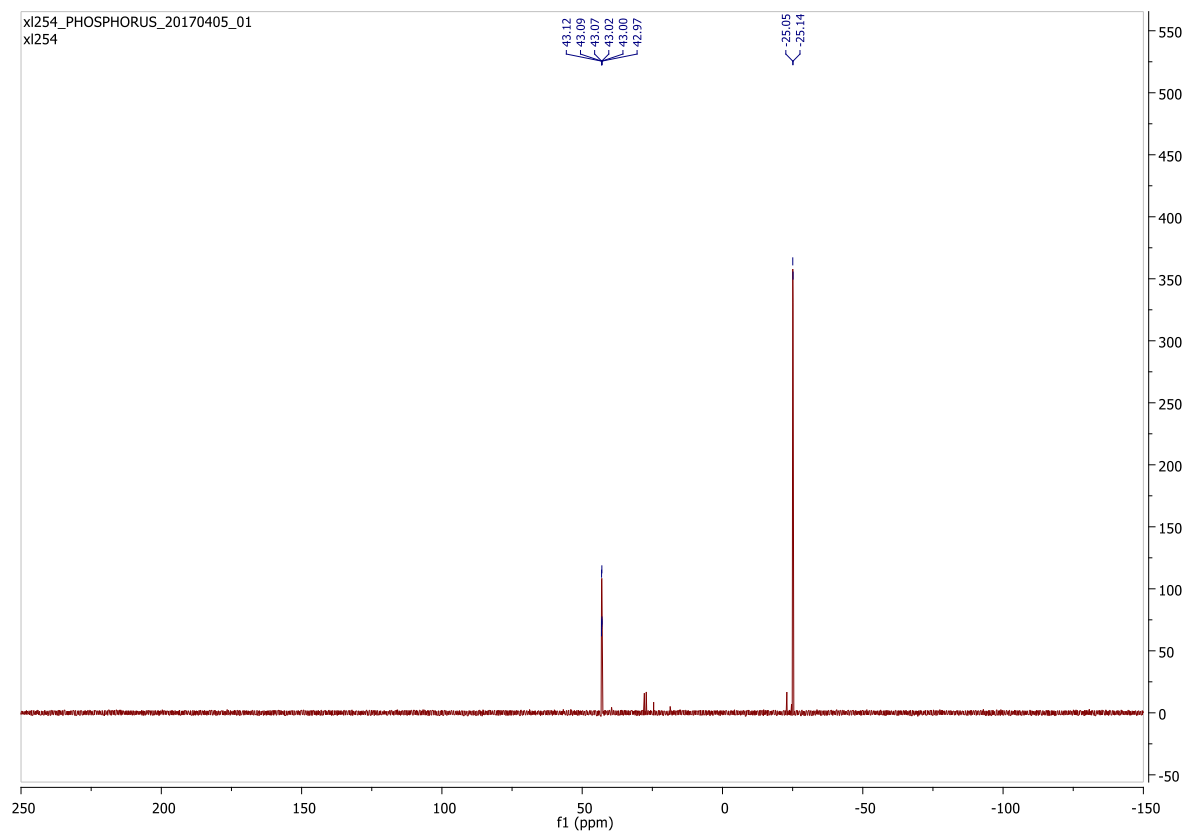

$^{31}\text{P}$  NMR Spectrum of ligand **L3**

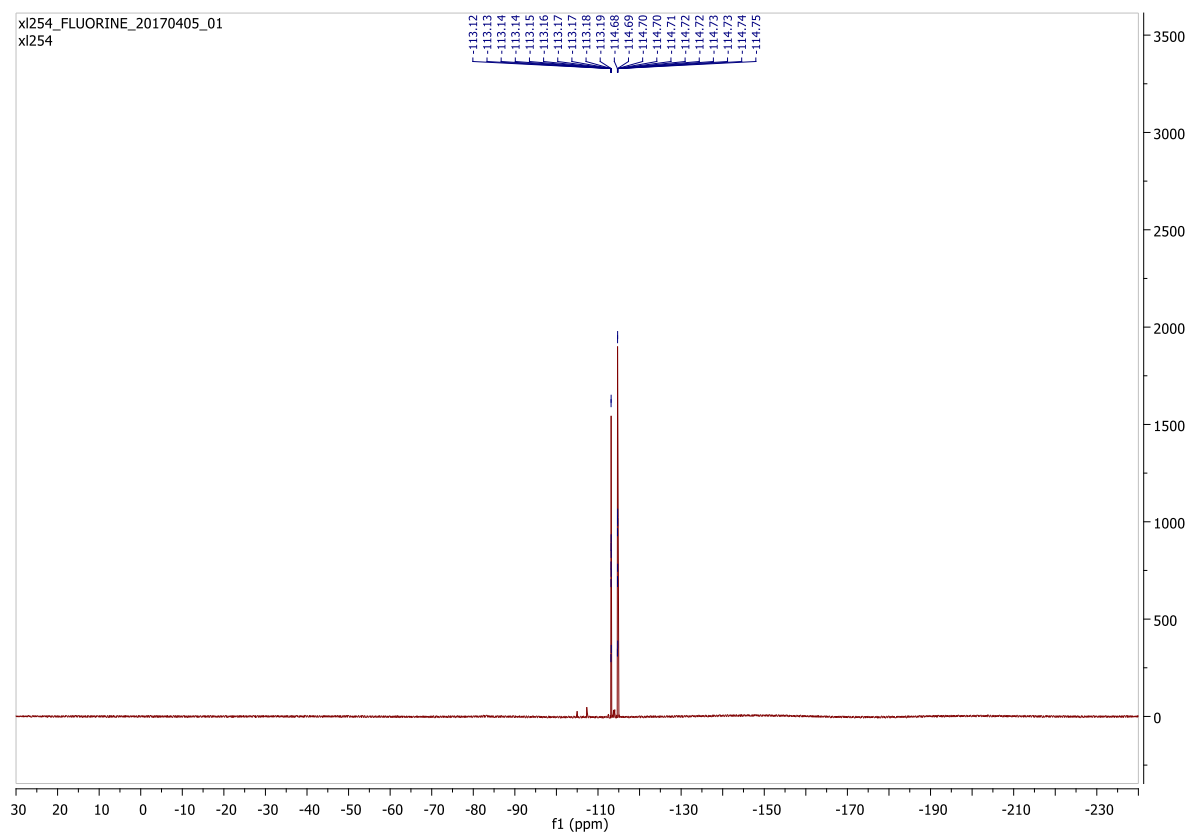

$^{19}\text{F}$  NMR Spectrum of ligand **L3**

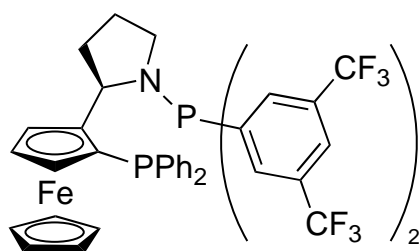

**L4**

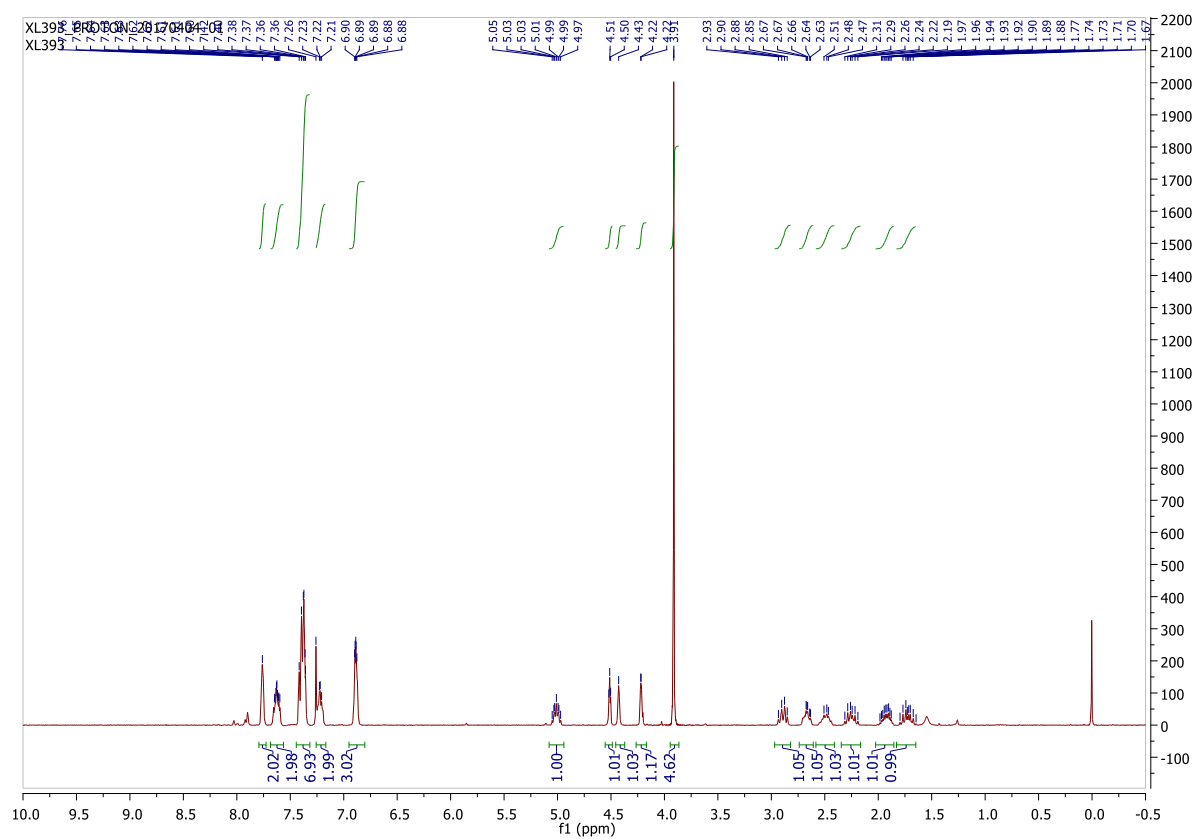

**<sup>1</sup>H NMR Spectrum of ligand L4**



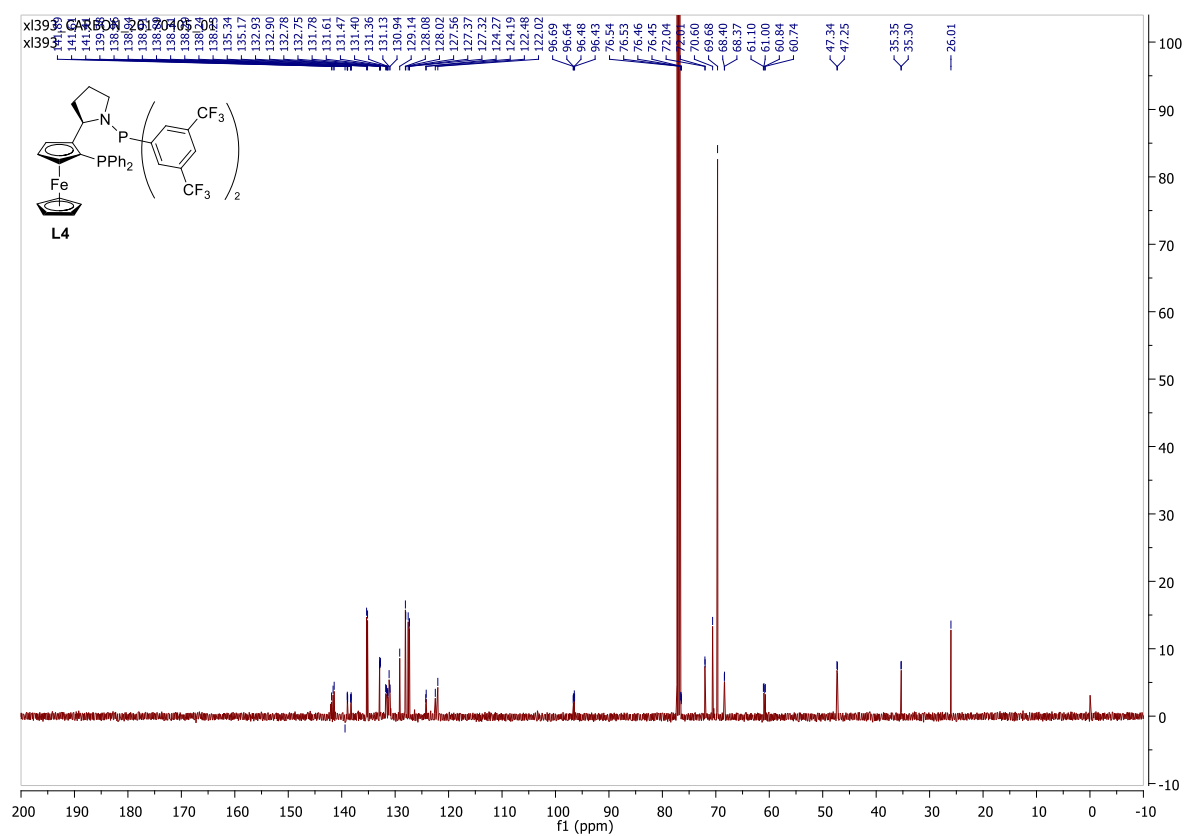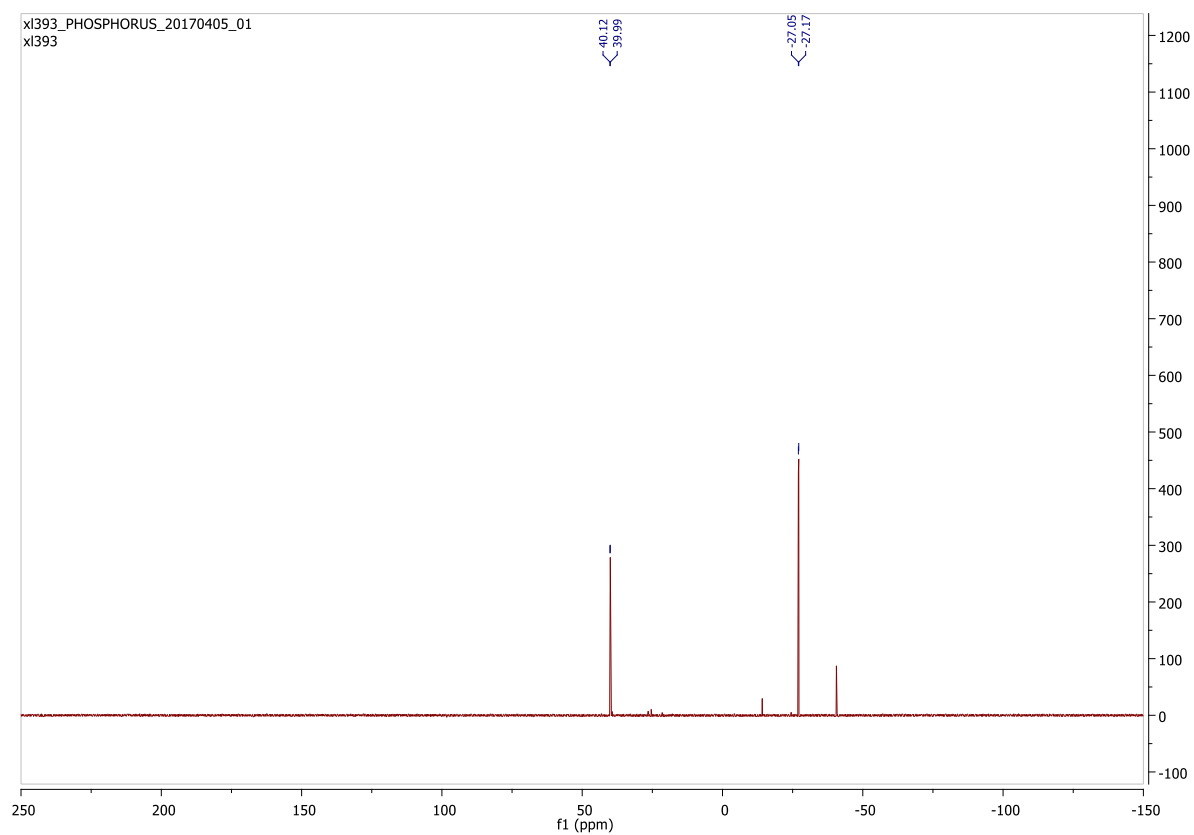

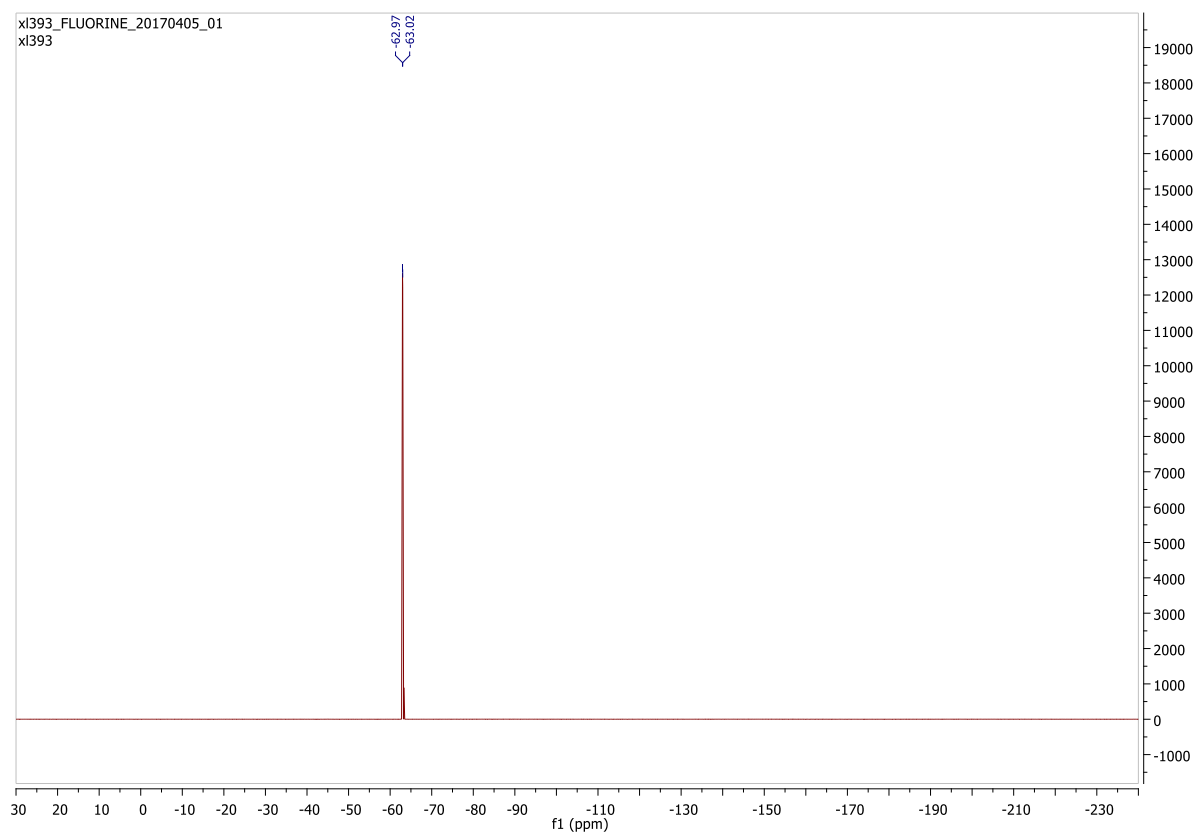

$^{19}\text{F}$  NMR Spectrum of ligand **L4**

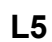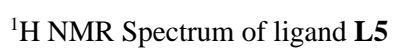

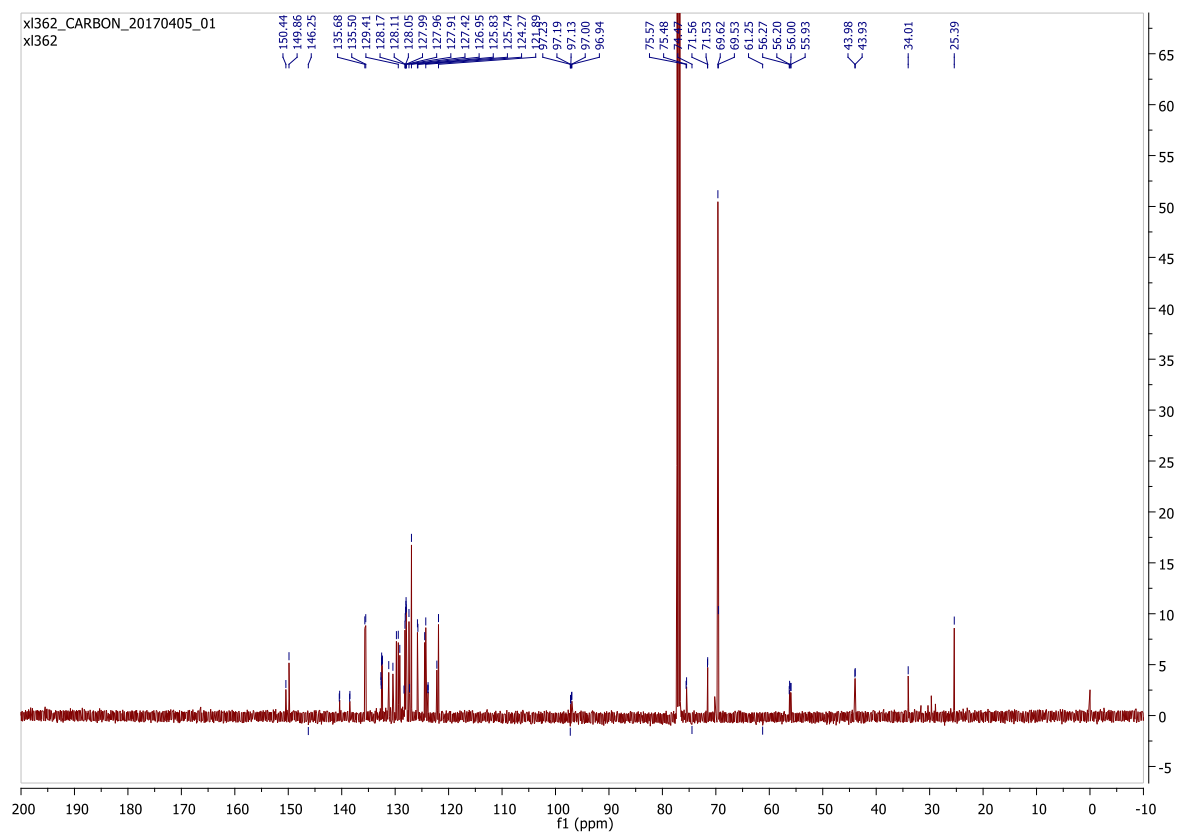

$^{13}\text{C}$  NMR Spectrum of ligand **L5**

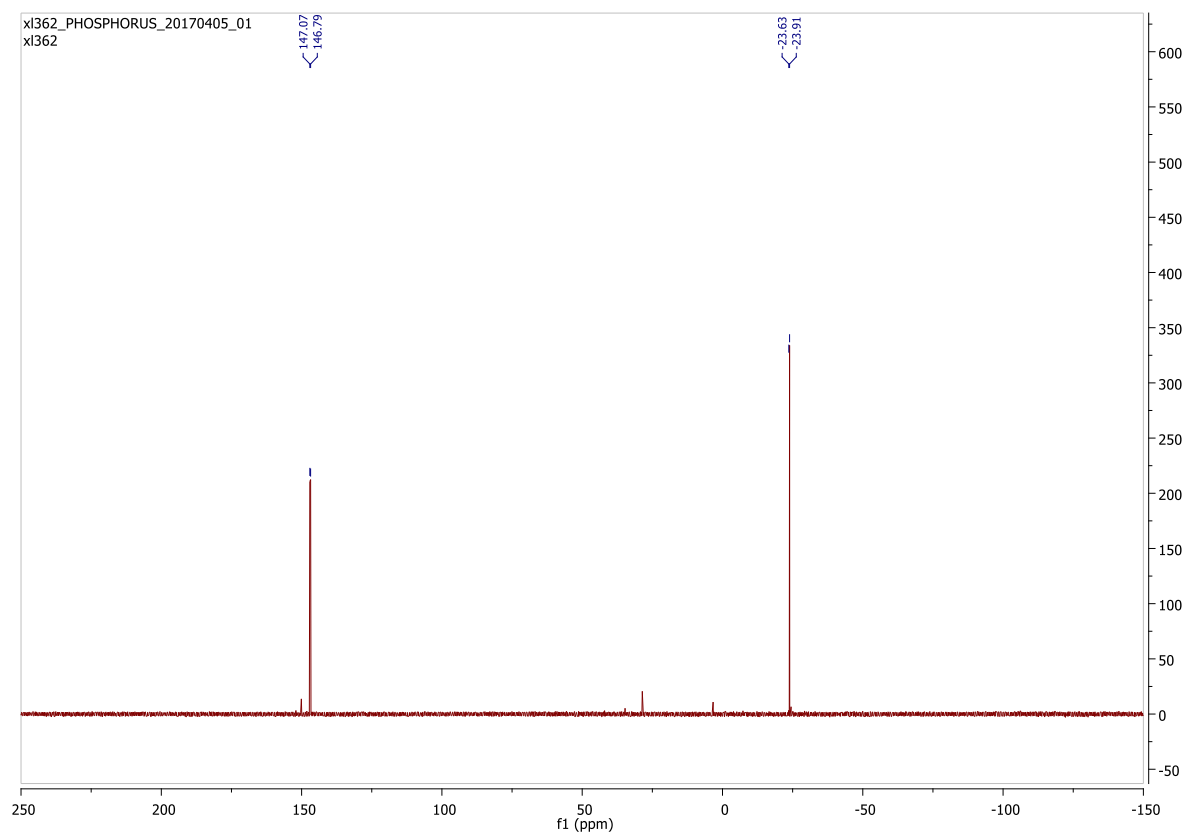

$^{31}\text{P}$  NMR Spectrum of ligand **L5**

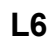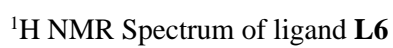

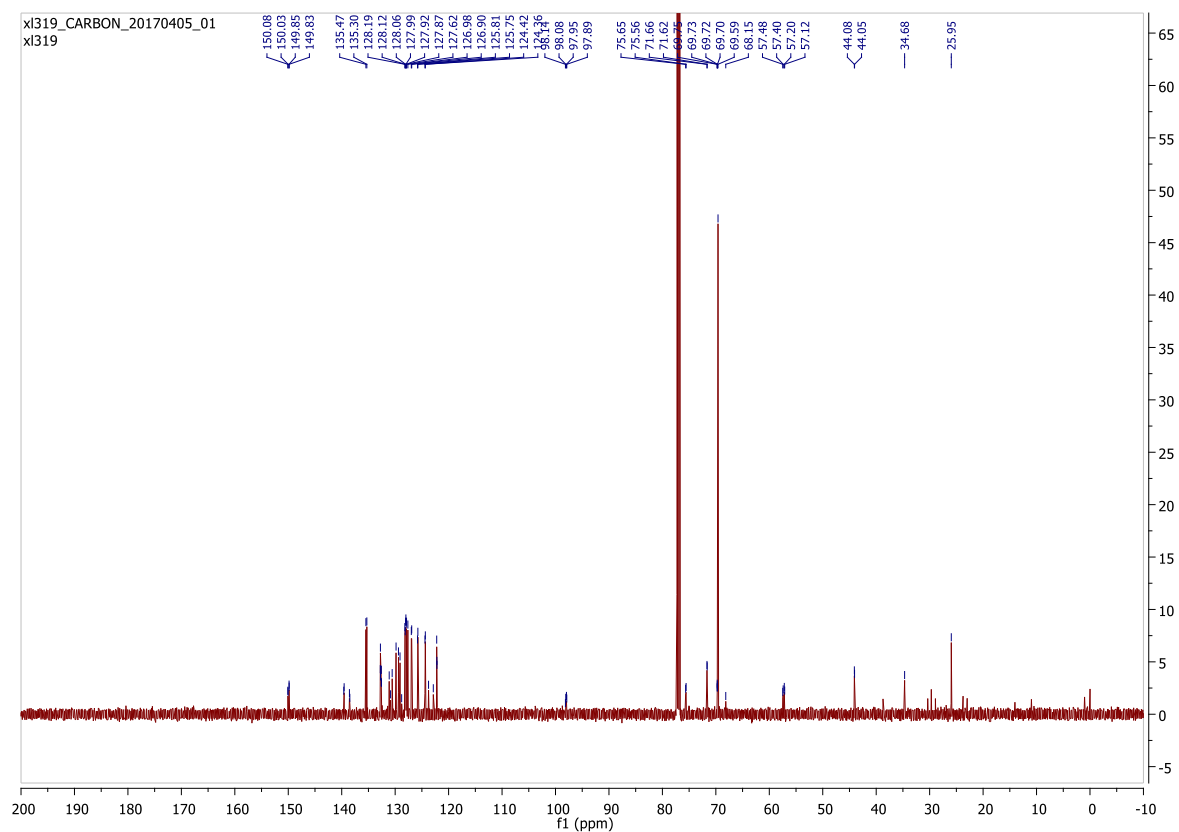

$^{13}\text{C}$  NMR Spectrum of ligand **L6**

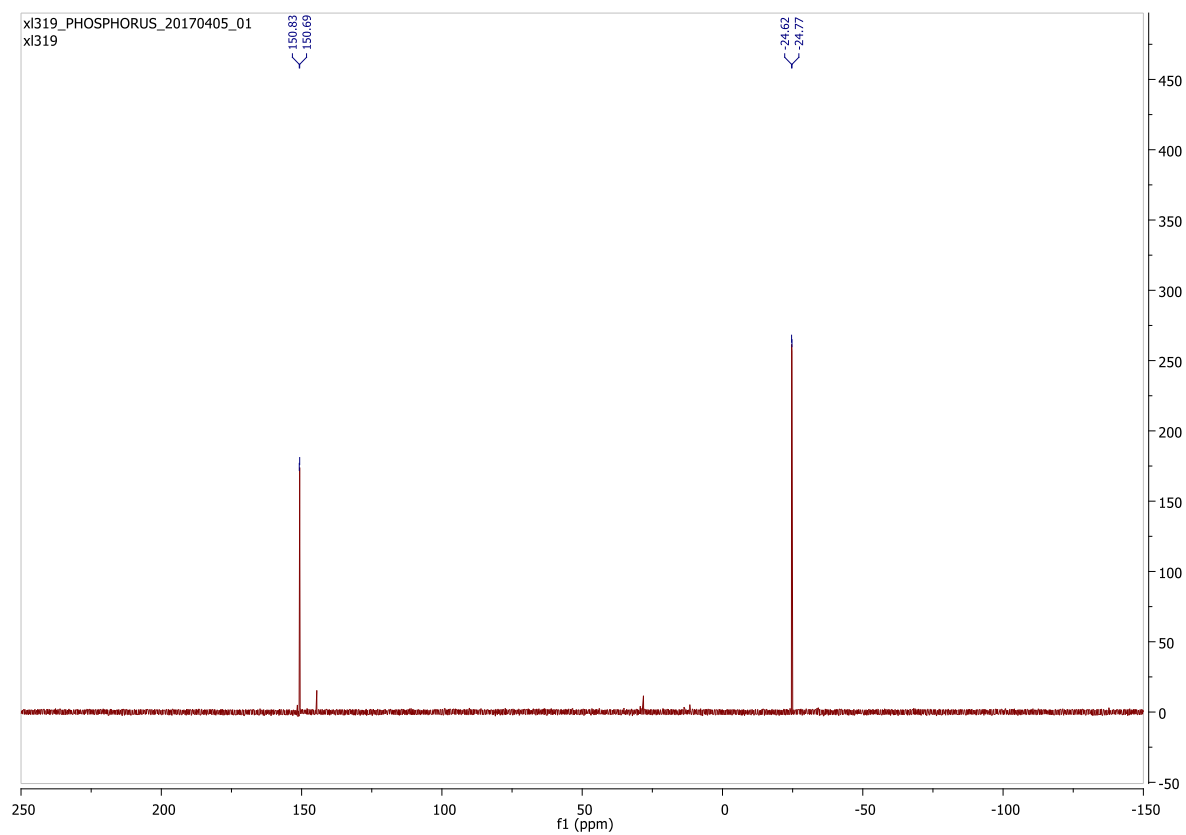

$^{31}\text{P}$  NMR Spectrum of ligand **L6**

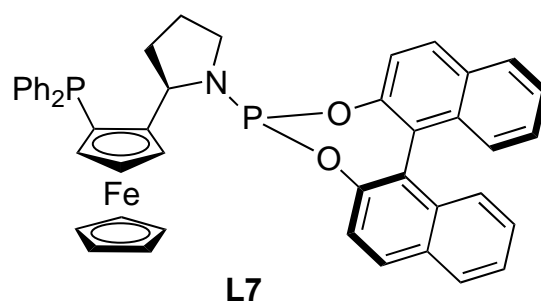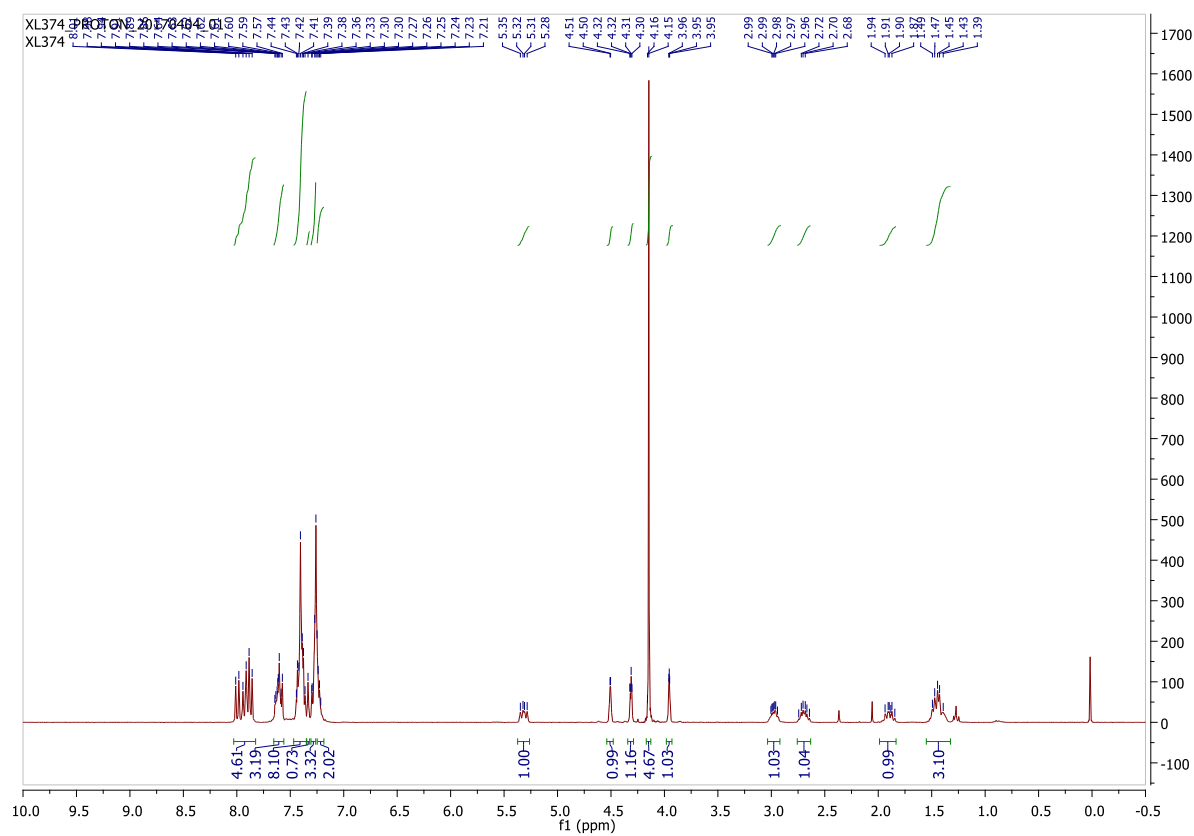

**<sup>1</sup>H NMR Spectrum of ligand L7**

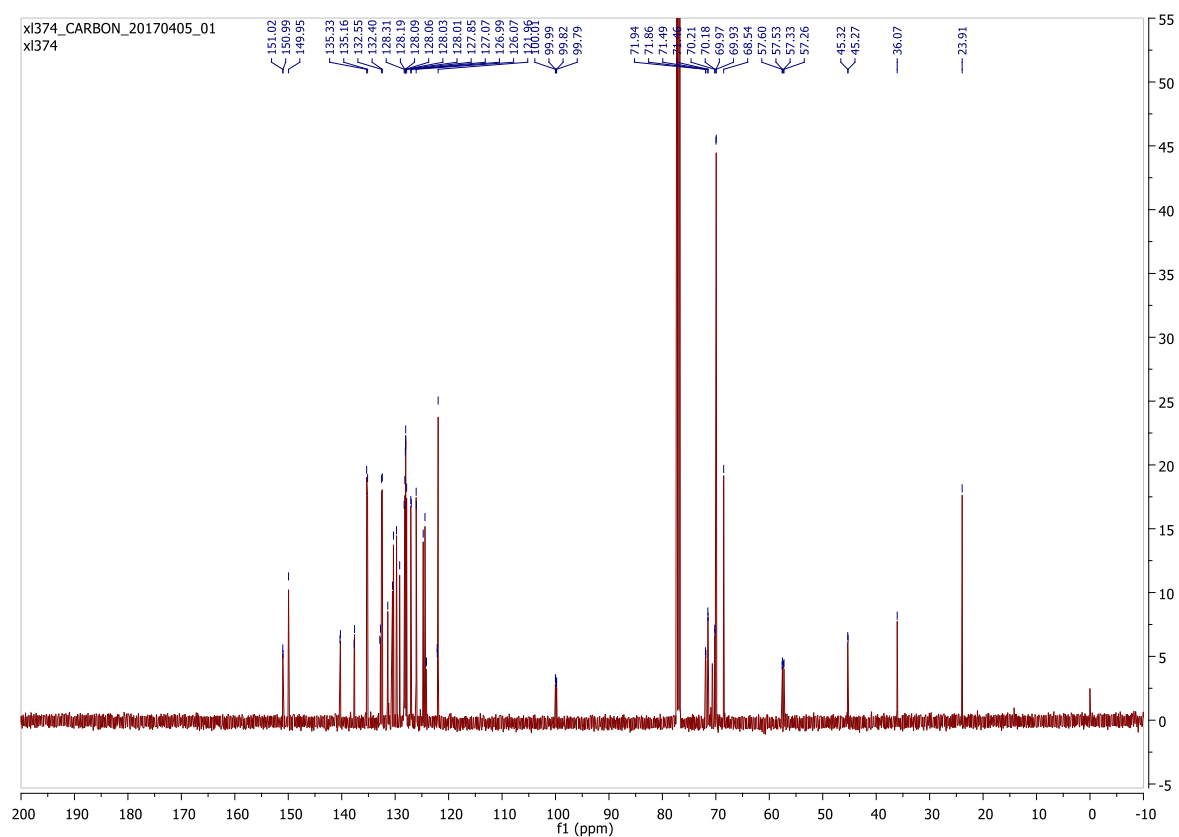

$^{13}\text{C}$  NMR Spectrum of ligand **L7**

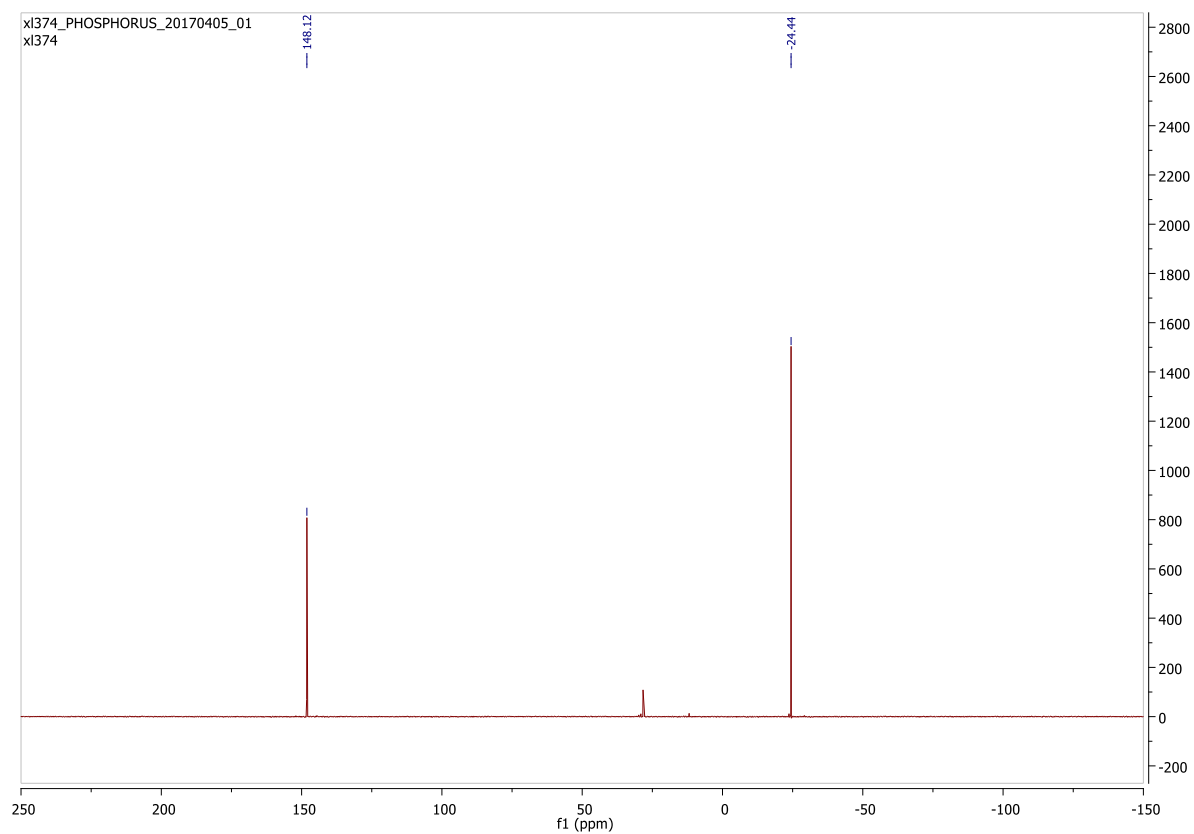

$^{31}\text{P}$  NMR Spectrum of ligand **L7**



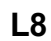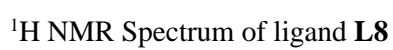

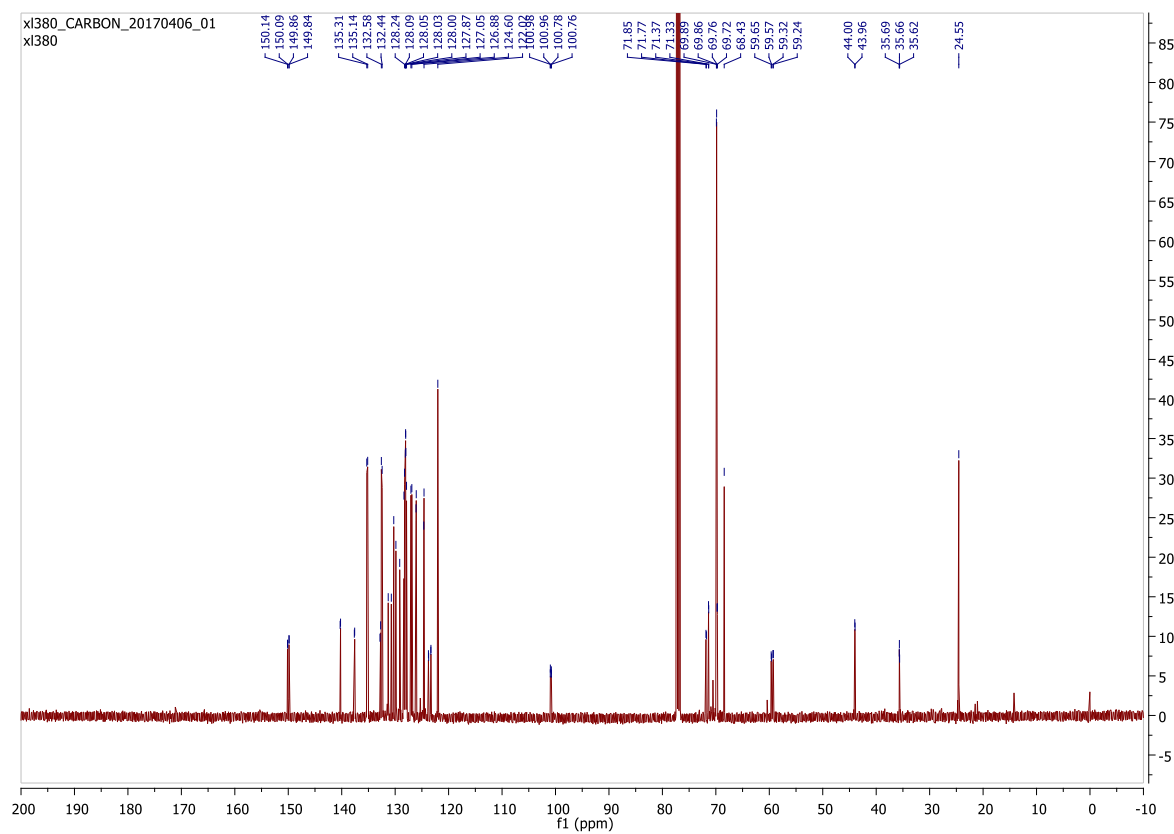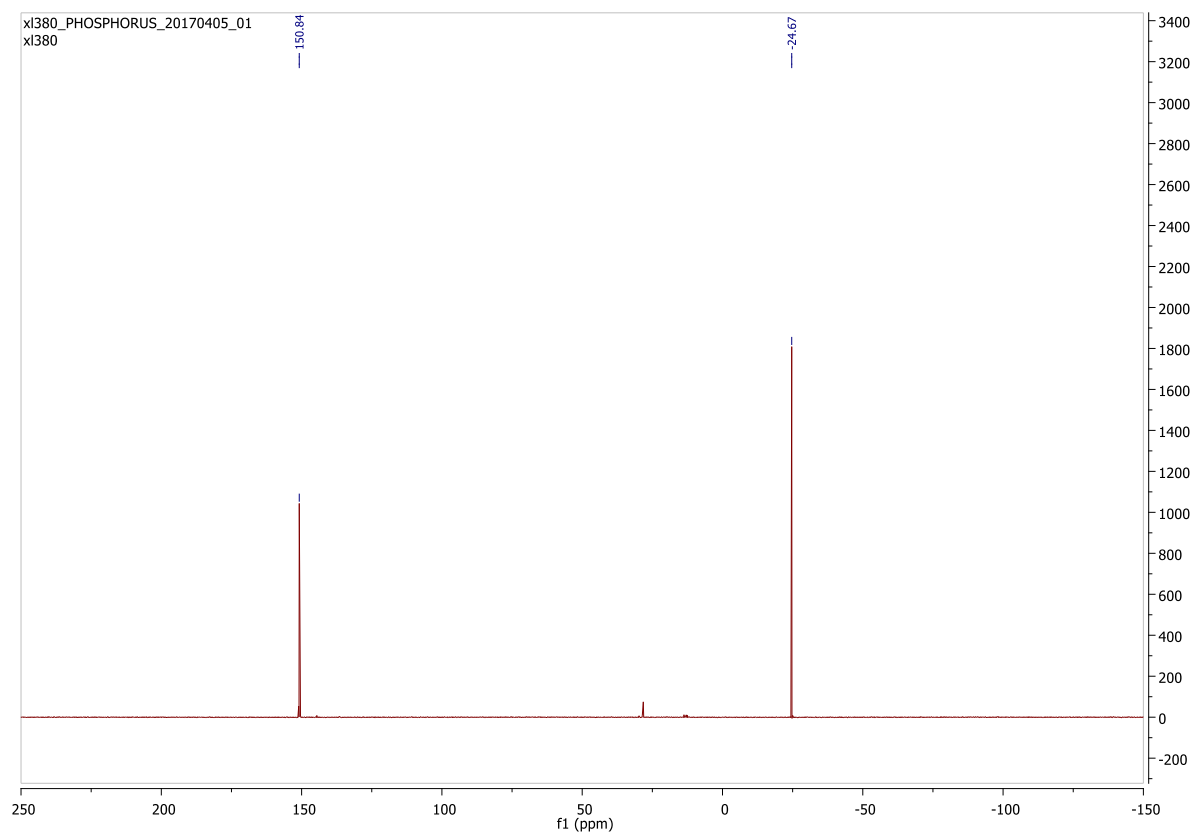

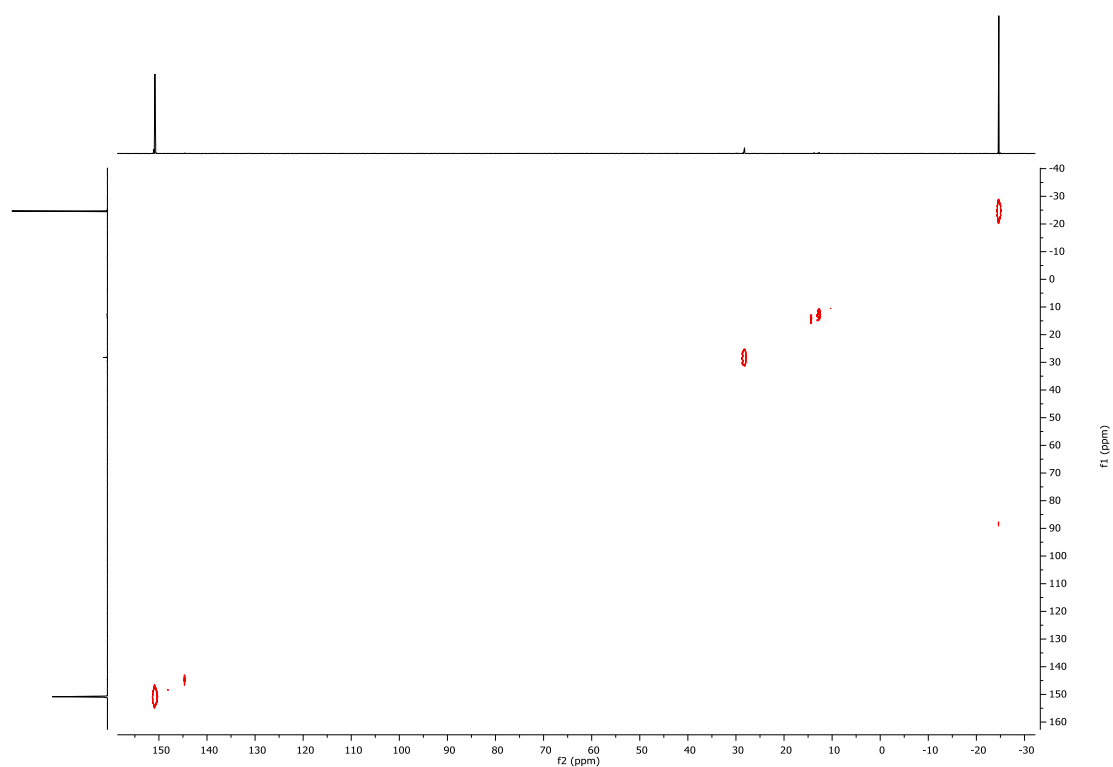

$^{31}\text{P}$ - $^{31}\text{P}$  COSY of ligand L8

## X-Ray Crystallographic Structure of L5

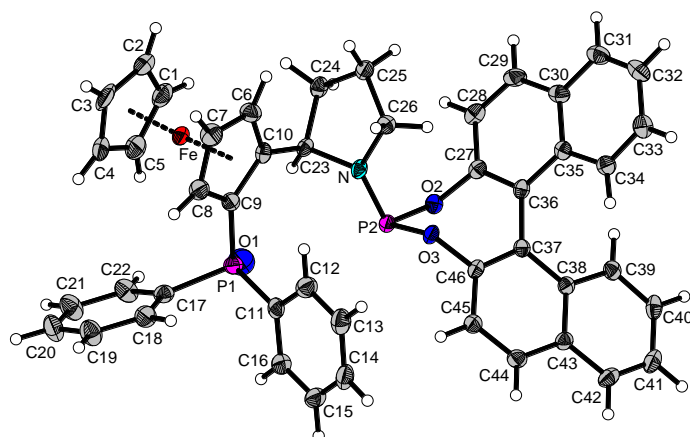

**L5** (molecule; thermal ellipsoids are drawn on the 50% probability level; O1 15% occupied)

Crystal data and structure refinement for **L5**.

|                                   |                                                                       |
|-----------------------------------|-----------------------------------------------------------------------|
| Identification code               | gui53                                                                 |
| Empirical formula                 | C <sub>46</sub> H <sub>37</sub> Fe N O <sub>2.15</sub> P <sub>2</sub> |
| Formula weight                    | 755.91                                                                |
| Temperature                       | 100(2) K                                                              |
| Wavelength                        | 1.54184 Å                                                             |
| Crystal system                    | Monoclinic                                                            |
| Space group                       | P 21                                                                  |
| Unit cell dimensions              | a = 8.0501(1) Å<br>b = 15.2402(3) Å<br>c = 14.8419(2) Å               |
| Volume                            | 1806.83(5) Å <sup>3</sup>                                             |
| Z                                 | 2                                                                     |
| Density (calculated)              | 1.389 Mg/m <sup>3</sup>                                               |
| Absorption coefficient            | 4.510 mm <sup>-1</sup>                                                |
| F(000)                            | 786.4                                                                 |
| Crystal size                      | 0.3073 x 0.2633 x 0.0342 mm <sup>3</sup>                              |
| Theta range for data collection   | 4.17 to 65.19°.                                                       |
| Index ranges                      | -9 ≤ h ≤ 9, -17 ≤ k ≤ 17, -17 ≤ l ≤ 17                                |
| Reflections collected             | 14880                                                                 |
| Independent reflections           | 6156 [R(int) = 0.0345]                                                |
| Completeness to theta = 65.19°    | 99.8 %                                                                |
| Absorption correction             | Analytical                                                            |
| Max. and min. transmission        | 0.860 and 0.397                                                       |
| Refinement method                 | Full-matrix least-squares on F <sup>2</sup>                           |
| Data / restraints / parameters    | 6156 / 1 / 474                                                        |
| Goodness-of-fit on F <sup>2</sup> | 1.066                                                                 |
| Final R indices [I > 2σ(I)]       | R1 = 0.0355, wR2 = 0.0891                                             |
| R indices (all data)              | R1 = 0.0386, wR2 = 0.0906                                             |
| Absolute structure parameter      | -0.017(3)                                                             |
| Largest diff. peak and hole       | 0.247 and -0.340 e.Å <sup>-3</sup>                                    |
